# Supplementary material for: Proteo-genetic analysis reveals clear hierarchy of ESX-1 secretion in Mycobacterium marinum
Source: PubMed Central journal article supplement — Proc Natl Acad Sci U S A. 2022 Jun 7;119(24):e2123100119. doi: 10.1073/pnas.2123100119 (PMC9214503; doi:10.1073/pnas.2123100119), 2022-06-07
Supplement: pnas.2123100119.sapp.pdf [file pnas.2123100119.sapp.pdf]

# PNAS

[www.pnas.org](http://www.pnas.org)

## **Supplementary Information for**

Proteo-genetic analysis reveals clear hierarchy of ESX-1 secretion in *Mycobacterium marinum*

Rachel M. Cronin, Micah J. Ferrell, Clare W. Cahir, Matthew M. Champion and Patricia A. Champion.

Patricia A. Champion and Matthew M. Champion  
Email: [pchampion@nd.edu](mailto:pchampion@nd.edu) and [mchampion@nd.edu](mailto:mchampion@nd.edu)

### **This PDF file includes:**

- Supplementary text:
- Supplementary Results
- Supplementary Methods
- Figures S1 to S10
- Tables S1 to S5
- Legends for Datasets S1 to S2
- SI References

### **Other supplementary materials for this manuscript include the following:**

- Datasets S1 to S2

## Supplementary Information Text

### Supplementary Results

**Proteo-genetic analysis of *M. marinum* secretion reveals distinct secretory profiles for ESX-1 substrates.** As indicated in Figure 2C, the secretion of several proteins clustered with the secretion of ESX-1 substrates. EsxA and EsxB share a clade with EsxN, an EsxA-like protein secreted by the ESX-5 system (1) and a broader clade with the probable serine protease PepA (MMAR\_0324) and the ESX-1 substrate PPE68 (2). In *M. marinum*, there are seven paralogous *esxN* genes, five of which yield identical proteins. It is unclear which EsxN protein(s) mirrors ESX-1 substrate secretion, which has been used before to detect novel ESX-1 substrates (2-4). EspE and EspF shared a broader clade with the probable cellulase, CelA (MMAR\_0107) and EgtD, part of the L-ergothioneine pathway which protects *M. tuberculosis* against oxidative stress (5). EspA and EspC shared a broader clade with MMAR\_4028, a conserved secreted protein of unknown function (6). Finally, EspB and EspJ share a larger clade with MMAR\_1442 (PG/PGRS protein), FadD2 (fatty acid Co-A ligase), MmaA3 (methyl mycolic acid synthase) and Efp (translation elongation factor) (6). Bioinformatic analysis of consensus targeting signals suggested that three of the nine proteins had predicted Sec signal sequences (7). The remaining six proteins had no predictable signal sequences (Sec or Tat systems) and were not predicted lipoproteins, similar to proteins secreted by alternate secretion pathways.

### Supplementary Methods

**Growth of *M. marinum* strains.** All *M. marinum* strains (listed in Table S1) were derived from the M strain (WT; ATCC BAA-525). Bacterial strains were maintained as previously described (4, 8, 9). Briefly, *M. marinum* strains were grown at 30°C in Middlebrook 7H9

liquid broth (Sigma-Aldrich, St. Louis, MO) with 0.5% glycerol and 0.1% Tween 80 (Amresco, Solon, OH) or on Middlebrook 7H11 agar (Sigma-Aldrich) supplemented with 0.05% glycerol and 0.5% glucose. Kanamycin (IBI Scientific, Peosta, IA) (20 µg/ml) or hygromycin (EMD Millipore, Billerica, MA) (50 µg/ml) were added to broth or agar when appropriate. Strains with integrating plasmids were grown in the absence of antibiotics. For all assays, it was estimated that 1 OD<sub>600</sub> unit is equivalent to  $7.7 \times 10^7$  cells/ml for *M. marinum*. *E. coli* DH5α (New England Biolabs, Ipswich, MA) was grown in LB (Luria-Bertani) medium (VWR) with 50µg/ml kanamycin or 200µg/ml hygromycin (Thermo Fischer, Waltham, MA) when necessary.

**Nomenclature.** The nomenclature used in this manuscript are aligned with those proposed by Bitter et al. (10). Briefly, components of the membrane complex of the ESX-1 secretory apparatus are named ESX-1 conserved component (Ecc). Additional ESX associated proteins (Esp) can be either substrates or components of the system. Esx proteins are ~100 AA proteins with a conserved WXG motif.

**Generation of *M. marinum* strains.** *M. marinum* strains were generated using allelic exchange (11) as published previously (12). Approximately 1,500bp upstream and downstream of the annotated open reading frame was amplified using PCR (see Table S2 for oligonucleotide primers). The PCR products were introduced into the p2NIL vector (Addgene plasmid number 20188; a gift from Tanya Parish (11)) by three-part FastCloning as previously described (13). Plasmid constructs were digested with PacI (NEB) and dephosphorylated using Antarctic phosphatase (NEB) with heat treatment at 80°C. The pGOAL19 vector (Addgene plasmid number 20190; a gift from Tanya Parish (11)) was digested with PacI (NEB) followed by 65°C heat treatment. pGOAL19 was ligated into p2NIL KO construct as previously described (9). Plasmids were quantified on a NanoDrop

instrument (Thermo Fisher), and 3 µg of plasmid was irradiated with 0.1 J/cm<sup>2</sup> UV light in a CL-1000 UV cross-linker (UVP) followed by electroporation into 500µl of electrocompetent *M. marinum* cells using a GenePulser XCell (Bio-Rad). Electrocompetent cells were prepared exactly as described previously (9, 14). Following electroporation, cells were transferred into 2 ml of 7H9 with 0.1% Tween 80 to incubate overnight at 30°C. Cells were collected by centrifugation, resuspended in 200µl of media, and plated on 7H11 agar (Sigma) supplemented with oleic acid-albumin-dextrose-catalase (OADC), 20 µg/ml kanamycin, and 60 µg/ml 5-bromo-4-chloro-3-indolyl-D-galactopyranoside (X-Gal). Merodiploids were picked, cultured, and then plated on 7H11 agar supplemented with OADC, 60 µg/ml X-Gal and 2% sucrose (Macron). White colonies were picked and cultured in 3 ml of 7H9 broth with 0.1% Tween 80. After approximately 5 days of growth, 500µl of culture was transferred to screw-cap tubes and 0.1 mm zirconia disruption beads (RPI) were added. Pellets were lysed by three 30 second pulses on a mini bead beater (Biospec Products) followed by a 10-minute centrifugation. 1µl of lysate was used in 10 µl PCR reactions. PCR products were run on TAE agarose gels stained with ethidium bromide (VWR) and imaged using a Gel Doc EZ imager (BioRad) and Image Lab software (BioRad). PCR products were interpreted as WT or knockouts based on the size of amplicons.

All oligonucleotide primers (Table S2) were purchased from Integrated DNA Technologies (IDT, Coralville, IA). All plasmids used in this study are listed in Table S1. All plasmids and genetic deletions were confirmed by targeted DNA sequencing performed by the Notre Dame Genomics and Bioinformatics Facility.

**Generation of complementation plasmids.** All complementation plasmids were generated by amplifying each gene from *M. marinum* genomic DNA using the primers listed in Table S2. All complementation plasmids were confirmed using targeted Sanger DNA sequencing at the Notre Dame Genomics and Bioinformatics Facility.

**Protein preparation and analysis.** Protein secretion assays were performed as described previously (4, 8, 9). In short, *M. marinum* strains were grown in 5 ml 7H9 broth with 0.1% Tween 80, then moved to 25 ml 7H9 broth with 0.1% Tween 80. Next, *M. marinum* strains were diluted to an OD<sub>600</sub> of 0.8 in Sauton's media with 0.01% Tween 80. Following 48 h of growth, *M. marinum* cells were collected by centrifugation. Supernatants were filtered through 0.2 µm Nalgene Stericups with polyethersulfone (PES) filters and 500 µl of phenylmethylsulfonyl fluoride (PMSF) at a concentration of 174.2 µg/ml in isopropanol was added to each sample. Supernatants were then concentrated by ultrafiltration in a 3,000-molecular-weight-cutoff (MWCO) Amicon filter (Millipore) to isolate secreted protein fractions. On ice, *M. marinum* cells were resuspended in 500 µl of PBS with 5 µl of PMSF at a concentration of 174.2 µg/ml was added to each sample. Cells were lysed using a Biospec Mini-BeadBeater-24, yielding the cell-associated protein fraction. The protein concentration was determined using the Pierce MicroBCA kit. The amount of protein loaded is indicated in figure legends. All antibodies were diluted in 5% nonfat dry milk in 1x phosphate-buffered saline (PBS) with 0.1% Tween 20 at the following concentrations: RNA polymerase subunit β (RNAP: 1:20,000, ab12087, Abcam), ESAT-6 (EsxA 1:500, HYB 076-08). The following reagents were obtained through BEI Resources, NIAID, NIH: polyclonal anti-*Mycobacterium tuberculosis* CFP-10 (gene *Rv3874*) (antiserum, rabbit 1:5,000, NR-13801) and polyclonal anti-*Mycobacterium tuberculosis* MPT-32 (gene *Rv1860*) (antiserum, rabbit; 1:30,000) (NR-13807). Horseradish peroxidase (HRP)-conjugated goat anti-mouse immunoglobulin secondary antibody (Bio-Rad) was used at 1:5,000 for detection of RNAP and ESAT-6. HRP-conjugated goat anti-rabbit IgG secondary antibody (Bio-Rad) was utilized at 1:20,000 for detection of CFP-10 and MPT-32. All proteins were detected as described previously (9).

**Hemolysis Assay.** Sheep red blood cell (sRBC) hemolysis assays were performed as previously described (15, 16), with the following modifications. Following three washes with PBS, *M. marinum* pellets were resuspended in 300µl of PBS, mixed with 100 µl of sRBCs, centrifuged, and incubated for 2 h at 30°C. The data shown in Figure 1B, S2 and S10 are the results of three independent biological replicates, each with three technical replicates. The error bars represents the standard deviation.

**Macrophage infections.** RAW 264.7 cells (ATCC TIB-71) were cultured and passaged as described previously (4). RAW 264.7 cells were seeded in 200 µl DMEM plus 10% FBS per well at  $2 \times 10^5$  cells/ml in a clear 96-well plate (Thermo Fisher, Denmark) and allowed to grow for 24 h. Bacteria were added at an estimated MOI of 5 in Figure 1C ( $1 \times 10^6$  cells/ml) and an estimated MOI of 2.5 in Figure S10 ( $5 \times 10^5$  cells/ml) in technical triplicate and mixed. Infections continued for 2h before gentamycin (RPI Corporation) was added at 100 µg/ml. Infections were incubated for an additional 4 h before washing three times with sterile 1x PBS and adding fresh DMEM plus 10% FBS. Infections then continued to proceed for 24 h. After 24 h, medium was aspirated and 50 µl of an EthD-1 (1 µl/ml), Calcein-AM (0.25 µl/ml) (Live/Dead viability/cytotoxicity kit; Life Technologies, Carlsbad, CA) solution in 1x PBS was added. Cells were incubated for an additional 30 min at 37°C. Cells were imaged as described previously (4). Five images were taken per well, and ImageJ software was then used to quantify the number of red cells per image, exactly as described previously (17). The data shown in Figure 1C are the results of three independent biological replicates for each strain, each with three technical replicates. The data shown in Figure S10 are the results of four independent biological replicates for each strain, each with three technical replicates.

**Proteomics.** Protein preparation-digestion. Secreted protein fractions from *M. marinum* strains were generated as described above. Samples were prepared for mass-spectrometry proteomics essentially as described in (18, 19). 100µg of protein from each sample above was precipitated using a seven-fold excess of acetone, chilled at -20° C for 1 hour then centrifuged to pellet, decanted, and dried at room temperature. Pellets were resuspended in 40µl 7% SDS, 10mM TCEP (Tris-carboxyethyl phosphine), 100mM TEAB (Triethyl ammonium bicarbonate) and heated to 95°C for 5 minutes with vortexing. Proteins were alkylated with 10mM iodoacetamide in the dark for 30 minutes, then quenched and prepared for S-Trap (Protifi, NY) digestion by addition of phosphoric acid to 1.3% v/v. Acidified protein was flocculated by addition of 7 volumes of 90:10 MeOH:100 mM TEAB and loaded on to an S-Trap column and washed according to manufacturer's instructions. 2.5 µg of sequencing grade trypsin (Promega, Madison, WI) was added to each sample, with 100 µl excess 100mM TEAB and allowed to digest for 12 hours at 37° C. Peptides were collected by centrifugation, and solvent was removed by Speed-vac until dry.

iTRAQ Labeling. Protein digests were resuspended in 100 µl 500 mM TEAB with vortexing and each sample was labeled with 1 vial 8-plex iTRAQ reagent according to manufacturer's instructions. The 113, and 114 mass channels were used for matched WT and  $\Delta eccCb_1$  controls for each biological replicate. Table S3 describes the labeling key. Labeling was allowed to proceed at room temperature for 2 hours with moderate shaking. After labeling, samples were quenched by addition of 20 µl 1M glycine, mixed and allowed to rest for 15 minutes, then formic acid was added to 0.2%. Samples were pooled and water with 0.1% formic acid was added to dilute the iTRAQ solvents to <2%. Pooled labeled samples were desalted using 30 mg HLB solid phase extraction sorbent (Waters, Milford, MA) using recommended procedures. Samples were dried down and stored at -20° C prior to nano-UHPLC-MS/MS analysis.

**MS-MS/MS Analysis.** *Proteomics Data Analysis:* Individual sets of iTRAQ labeled samples were subjected to nano-UHPLC MS-MS/MS essentially as in (19, 20). Triplicate MS-MS/MS were acquired on a Q-Exactive HF instrument running an iTRAQ adjusted TOP 15 acquisition. RAW files were converted to .mgf using MS-Convert (Proteowizard) and protein-spectral matching and iTRAQ quantification was performed using Protein Pilot with the Paragon Algorithm (21, 22) and background quantitative correction. RAW and processed files are available at MassIVE <ftp://massive.ucsd.edu/MSV000088597/PDX030584>. Samples were normalized using median normalization and adjusted manually as needed to correct for the individual WT samples. Data from the mutant strains was background subtracted to eliminate isobaric interference generating false-positive abundance for the deleted proteins. In some cases we identified signals for proteins whose genes were deleted which we expect is due to isobaric interference, despite our efforts to minimize this. However, these levels of detection were very low. For example, the levels of PPE68 we measured were <0.1 of the amount of PPE68 protein detected from the WT strain. I.e., PPE68 is the 600<sup>th</sup> protein on the list in order of relative abundance (See Dataset S1A). Moreover, PPE, EsxB, and EspJ proteins generate poor tryptic fragments, many of which are identical to other proteins. EspJ in particular is expected to be extremely poorly resolved using trypsin as the protease. Despite its moderate mass (~26 KDa) it produces only a single tryptic peptide with high reliability. In Bosserman et al., we did not detect EspJ in the protein fractions from the  $\Delta$ MMAR\_2894 strain and reported the fold change as the limit-of-detection in the experiment.

Three or more of the tryptic peptides for PPE68 are nearly identical to those found in a PPE68 homolog, B2HM15 MMAR\_5417 which could be a source of mis-assigned signal or near-isobar interference. We consider the data here (~8 fold reduction) to be more reliable, however EspJ is problematic as a proteomics target. In general the data here under



report fold-change as compared to label-free data. This is to some extent expected as isobaric tags are generally known to have a lower dynamic range than targeted and label-free quantification (23). The resulting normalized protein data were exported as CSV files and joined using R Studio (See Supplementary Methods).

Our initial  $P$  value cut-off used in this study was  $P = .05$ . The standard error used in the  $P$  value calculation is based on the average of the number of peptides detected. Since ESX substrates in general are small, standard errors can vary widely and the software fixes the standard deviation at 0.17 for cases in which proteins are assigned with <4 peptides which is the vast majority of ESX-related substrates (24). This is likely an overestimate of the standard deviation. We initially erred on the side of caution, and made exceptions as described in the text to this strict cutoff for cases in which the proteins are missing from a sample in absolute terms, (E.g. a deletion), or small numbers of available peptides for quantification (ESX-1 substrates).

**Functional Analysis:** To define the proteins whose secretion was significantly reduced by the deletion of individual genes; functional analysis was performed as follows. Using the untrimmed data that generated the volcano plots, we used a cut off of  $\log_2$  fold change  $\geq -1$ , with  $P$  values  $\leq 0.05$ . The functional category of each resulting protein was defined using Mycobrowser (6). The number of proteins in each functional category was defined using the COUNTIF command in Microsoft Excel, and the resulting data was plotted on Donut plots using Prism 9.

**Statistical Analyses:** All statistical analyses were performed as described in the figure legends using Prism 9.

**Proteomic Data Assembly:** R version 4.0.4 (2021-02-15) -- "Lost Library Book" in R Stu-

dio was used to join the six datasets resulting from the iTRAQ experiments as follows:

**#Read in data for alpha set of deletion strains:**

```
library(readxl)
Alpha_iT8_1_QEHF_R1_03A_tidy <- read_excel("Downloads/wran-
gle03a/Alpha_iT8_1_QEHF_R1_03A_tidy.xlsx")
View(Alpha_iT8_1_QEHF_R1_03A_tidy)
library(readxl)
Alpha_iT8_A_QEHF_R1_03A_tidy <- read_excel("Downloads/wran-
gle03a/Alpha_iT8_A_QEHF_R1_03A_tidy.xlsx")
View(Alpha_iT8_A_QEHF_R1_03A_tidy)
```

**#Join the alpha subset of data and remove redundant columns**

```
library(dplyr)
A_HF_joined <- full_join(Alpha_iT8_1_QEHF_R1_03A_tidy, Al-
pha_iT8_A_QEHF_R1_03A_tidy, by = "Accession")
View(A_HF_joined)
A_HF_joined_1 <- A_HF_joined %>% select(-"Name.y", -"Species.y")
```

**#Read in data for beta set of deletion strains:**

```
library(readxl)
Beta_iT8_1_QEHF_R1_03A_tidy <- read_excel("Downloads/wran-
gle03a/Beta_iT8_1_QEHF_R1_03A_tidy.xlsx")
View(Beta_iT8_1_QEHF_R1_03A_tidy)
library(readxl)
Beta_iT8_A_QEHF_R1_03A_tidy <- read_excel("Downloads/wran-
gle03a/Beta_iT8_A_QEHF_R1_03A_tidy.xlsx")
View(Beta_iT8_A_QEHF_R1_03A_tidy)
```

**#Join the beta subset of data and remove redundant columns**

```
B_HF_joined <- full_join(Beta_iT8_1_QEHF_R1_03A_tidy,
Beta_iT8_A_QEHF_R1_03A_tidy, by = "Accession")
View(B_HF_joined)
B_HF_joined_1 <- B_HF_joined %>% select(-"Name.y", -"Species.y")
View(B_HF_joined_1)
```

**#Read in data for delta set of deletion strains:**

```
library(readxl)
Delta_iT8_1_QEHF_R1_03A_tidy <-read_excel("Downloads/wran-
gle03a/Delta_iT8_1_QEHF_R1_03A_tidy.xlsx")
View(Delta_iT8_1_QEHF_R1_03A_tidy)
library(readxl)
Delta_iT8_A_QEHF_R1_03A_tidy <- read_excel("Downloads/wran-
gle03a/Delta_iT8_A_QEHF_R1_03A_tidy.xlsx")
View(Delta_iT8_A_QEHF_R1_03A_tidy)
```

**#Join the delta subset of data and remove redundant columns**

```
D_HF_joined <- full_join(Delta_iT8_1_QEHF_R1_03A_tidy,
Delta_iT8_A_QEHF_R1_03A_tidy, by = "Accession")
View(D_HF_joined)
D_HF_joined_1 <- D_HF_joined %>% select(-"Name.y", -"Species.y")
```

**#Join the alpha, beta and delta subset of data and remove redundant columns**

```
AB_HF_joined<- full_join(A_HF_joined_1, B_HF_joined_1, by =
"Accession")
```

```

View(AB_HF_joined)
AB_HF_joined_1 <- AB_HF_joined %>% select(-"Name.x.y", -"Species.x.y")
ABD_HF_joined<- full_join(AB_HF_joined_1, D_HF_joined_1, by =
  "Accession")
View(ABD_HF_joined)
ABD_HF_joined_1 <- ABD_HF_joined %>% select(-"Name.x", -"Species.x")
library(writexl)
write_xlsx(ABD_HF_joined_1,"All_KOs_03A")

```

**Generation of Volcano plots:** The average fold-change was converted to Log<sub>2</sub> Fold Change, and plotted against the -log<sub>10</sub> of the average P value from 3 (mutant) or 2 (complemented) biological replicates (except for EspB complementation, which only had one usable complemented data set, and EspA complementation which had three biological replicates). The data for the volcano plots was untrimmed. Conversion to -log<sub>10</sub> P value and thresholding was performed in R as follows (Example shown is for *eccCb1*/WT, Figure 3A):

```

#Read in data
library(readxl)
EccCb1_Volcano_test_ <- read_excel("Dropbox/HEFQ itraq
  data/EccCb1 Volcano test .xlsx")
View(EccCb1_Volcano_test_)
#Generate the volcano plot, including calculating the -log10Pvalue and thresholding to
Pval<0.05
library(ggplot2)
EccCb1_Volcano_test_ $threshold=as.factor(EccCb1_Vol-
  cano_test_ $Avg_Pval < 0.05)
g <- ggplot(data = EccCb1_Volcano_test_, aes(x=Log2_Fold_Change,
  y = -log10(Avg_Pval), color = threshold)) + geom_point(al-
  pha = 0.4, size = 4) + xlim(c(-8, 8)) + theme_bw()
g
#Annotate the known ESX-1 substrates, add lines, format x axis and increase text size
g +theme(text=element_text(size = 20))+ geom_hline(yintercept =
  -log10(0.05), linetype = "dashed") + geom_vline(xintercept
  = c(log2(0.5), log2(2)), linetype = "dashed") + anno-
  tate("text", x = -5.07, y = 3.35, label = "EspB", size =
  8)+annotate("text", x = -4.54, y = 1.25, label = "EsxA",
  size = 8) + annotate("text", x = -5.65, y = 1.8, label =
  "EspF", size = 8) + annotate("text", x=-6.1, y=1.25, label
  = "EspE", size = 8) + annotate("text", x= -4.59, y = 1.65,
  label = "EspA", size = 8) + annotate("text", x = -5.27, y =
  2.1, label = "EsxB", size = 8) + annotate("text", x = -

```

```

3.06, y = 0.65, label = "PPE68", size = 8) + anno-
tate("text", x = -4.13, y = 1.90, label = "EspK", size = 8)
+ annotate("text", x = -2.4006, y = .80, label = "EspC",
size = 8)+ annotate("text", x = -1.625, y = 2.90, label =
"Pks5", size = 8) + annotate("text", x = -1.337, y = 1.77,
label = "Pks15/1", size = 8)

```

This website aided us with this script: [https://rforbiochemists.blog-](https://rforbiochemists.blogspot.com/2015/06/drawing-proteomic-data-volcano-plot.html)

[spot.com/2015/06/drawing-proteomic-data-volcano-plot.html](https://r-graphics.org/recipe-scatter-labels), [https://r-graphics.org/rec-](https://r-graphics.org/recipe-scatter-labels)

[ipe-scatter-labels](https://r-graphics.org/recipe-scatter-labels). The thresholded data used for the generation of the volcano plots is

found in Data Set 2.

**Generation of ESX-1 substrate heatmap:** To generate the heatmap (Figure 4A), log<sub>2</sub> fold change values from Supplementary Data Set 1 were extracted for known ESX-1 substrates (Data Set 1, Tab E). The heat map was generated using the following code in

R Studio:

```

#Input the datafile
library(readxl)
ESX_1_substrates_tidy_for_heatmap <- read_excel("Dropbox/HEFQ
itraq data/ESX-1 substrates tidy for heatmap.xlsx")
View(ESX_1_substrates_tidy_for_heatmap)
#Rename numbered rows using the substrate Names
library(pheatmap)
row.names(ESX_1_substrates_tidy_for_heatmap) <- ESX_1_sub-
strates_tidy_for_heatmap$Name
#Generate the heat map
df <- data.matrix(ESX_1_substrates_tidy_for_heatmap)
pheatmap(df[, -(1)], cutree_rows = 4)

```

**Generation of *M. marinum* whole proteome heatmap:** To generate the heatmap of the entire proteome, the dataset was trimmed to remove all “reversed” protein calls. The heatmap in Figure 2, and the readable version of the Heatmap in Figure S4 was generated from the data in Dataset S1, tab B using the following code in R Studio:

```

# Uploading data, making the accession number for each protein the row name and
omitting N/A from the dataset.
library(readxl)
test_case_trimmed <- read_excel("Dropbox/HEFQ itraq data/test
case.xlsx")
View(test_case)

```

```

test_case_trimmed<-as.data.frame(test_case)
row.names(test_case)<-test_case$Accession
test_case<-test_case[,-1]
df <- as.matrix(test_case)
df <- na.omit(df)

```

#### **#Formatting and downloading the readable heatmap (Figure S4)**

```

pheatmap(df, scale = "row", cluster_rows = TRUE , cluster_cols =
  TRUE,
  + clustering_distance_cols = "euclidean", clustering_dis-
  tance_rows = "euclidean", + clustering_method =
  "complete", fontsize=9, fontsize_row=5, cellwidth = 9, +
  cellheight = 5, main = "Heatmap", filename =
  "Heatmap_rowclear_PAC.pdf")

```

#### **#Formatting and downloading the readable heatmap (Figure 2)**

```

pheatmap(df, scale = "row", cluster_rows = TRUE , cluster_cols =
  TRUE,
  + clustering_distance_cols = "euclidean", cluster-
  ing_distance_rows = "euclidean",
  + clustering_method = "complete", show_rownames=F,
  main = "Heatmap", filename = "Heatmap_PAC.pdf")

```

### **Generation of Pearson Correlation, Figure 2C.** Pearson correlation was performed in

R Studio using the data in Dataset S1 tab C as follows:

#### **#Uploading data and performing and formatting the correlation**

```

library(corrplot)
library(ggplot2)
library(readxl)
All_Clusters_for_correlation <- read_excel("Dropbox/HEFQ itraq
  data/ All_Clusters_for_correlation.xlsx")
View(All_Clusters_for_correlation)
cc=cor(All_Clusters_for_correlation, method = "pearson")
corrplot(cc)
corrplot(cc, tl.col = "black", addrect = 4, tl.cex = 0.7)
This website (https://jkzorz.github.io/2019/06/11/Correlation-heatmaps.html) assisted us

```

in developing this code.

**Generation of Venn Diagrams.** Venn diagrams were generated using Venny (*Oliveros, J.C. (2007-2015) Venny. An interactive tool for comparing lists with Venn's diagrams. <https://bioinfogp.cnb.csic.es/tools/venny/index.html>*). The input for Venny was the untrimmed list of names of proteins whose log<sub>2</sub> fold change  $\leq -1$ . The resulting output was

used to generate each scaled Venn Diagram in R using R Studio, taken from “The code was R: Draw a Venn diagram with two sets, by Hanbo Chen”

as follows:

```
venn.plot <- draw.pairwise.venn(  
+   area1 = 20,  
+   area2 = 35,  
+   cross.area = 15,  
+   category = c("core", "espB"),  
+   fill = c("blue", "red"),  
+   lty = "blank",  
+   cex = 2,  
+   cat.cex = 2,  
+   cat.pos = c(285, 105),  
+   cat.dist = 0.09,  
+   cat.just = list(c(-1, -1), c(1, 1)),  
+   ext.pos = 30,  
+   ext.dist = -0.05,  
+   ext.length = 0.85,  
+   ext.line.lwd = 2,  
+   ext.line.lty = "dashed"  
+ )  
grid.newpage()  
grid.draw(venn.plot)
```

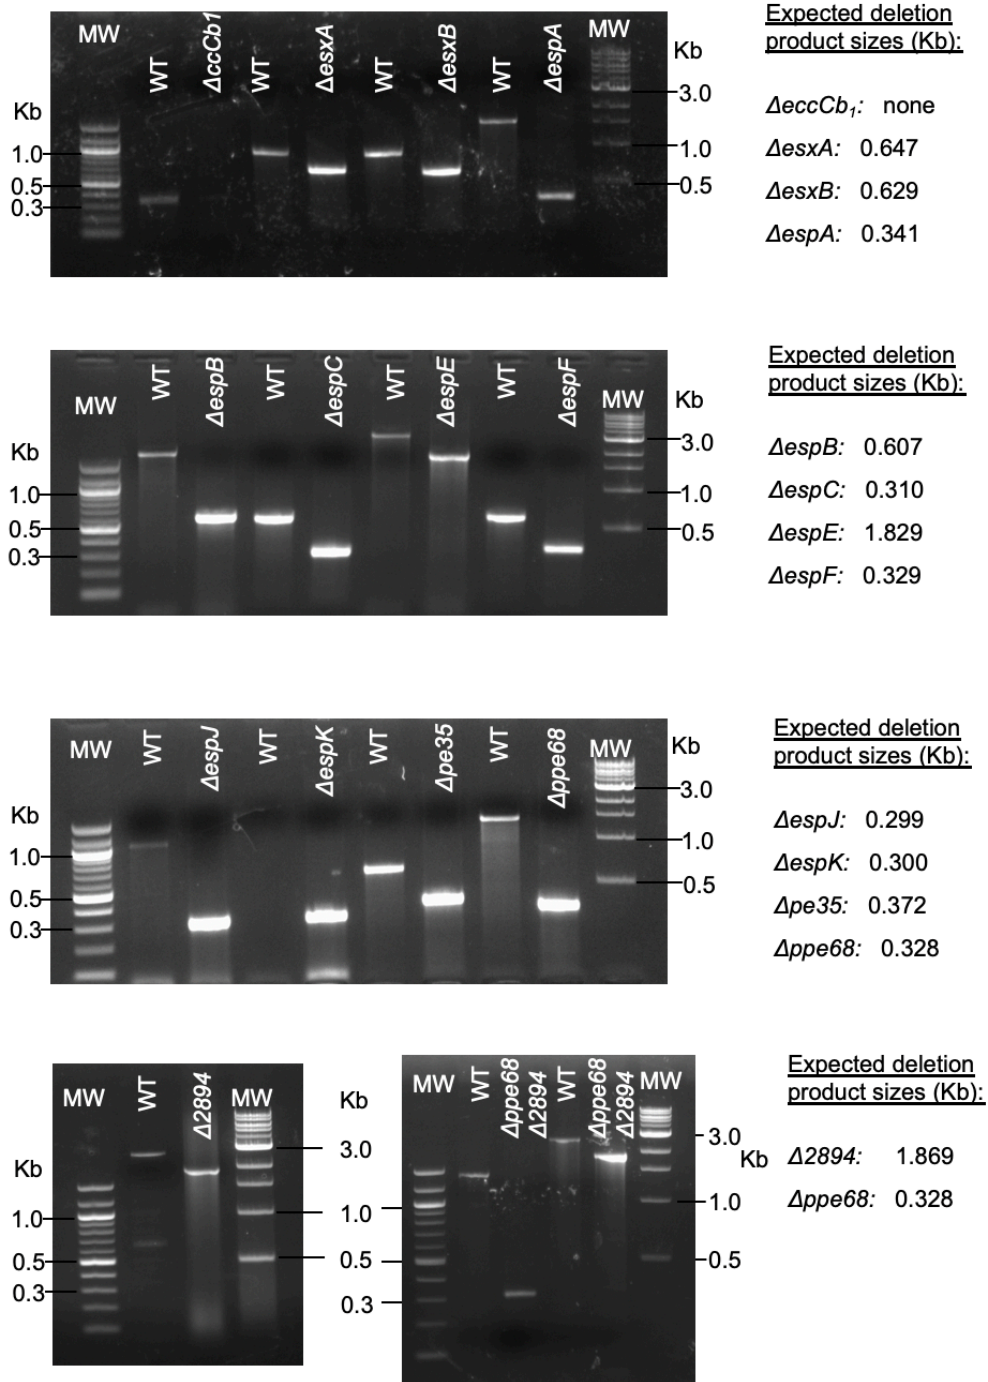

**Figure S1: Confirmation of ESX-1 substrate gene deletions in *M. marinum*.** Genetic deletion of ESX-1 substrate genes was confirmed using PCR on the whole cell lysates with the primers in Table S2. All deletions were further verified by targeted DNA sequencing.

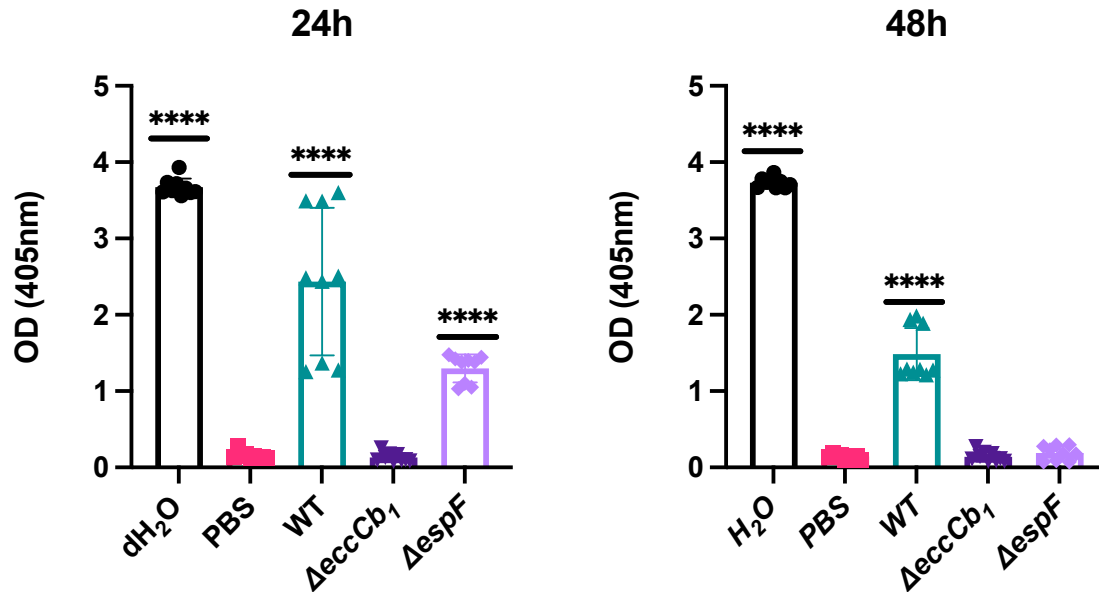

**Figure S2: The requirement of EspF in hemolysis is dependent upon growth phase.** Hemolysis assay performed on *M. marinum* strains. Strains were grown in 10 ml 7H9 broth for 24 or 48 hours. The same 10ml culture was used to measure hemolysis at 24 and 48 hour time points. Means of data from three biological replicates, in technical triplicate, are shown. Statistical analysis was performed using a one-way ordinary ANOVA ( $P < .0001$ ), followed by a Tukey's Multiple Comparison Test. \*\*\*\*,  $P < .0001$ , as compared to the  $\Delta eccCb_1$  strain. The data in Figure 1B were generated after 24 hours in 7H9 broth. The data we published previously demonstrating a requirement for EspF in hemolysis was generated after 48 hours in 7H9 broth (8). Error bars represent standard deviation.



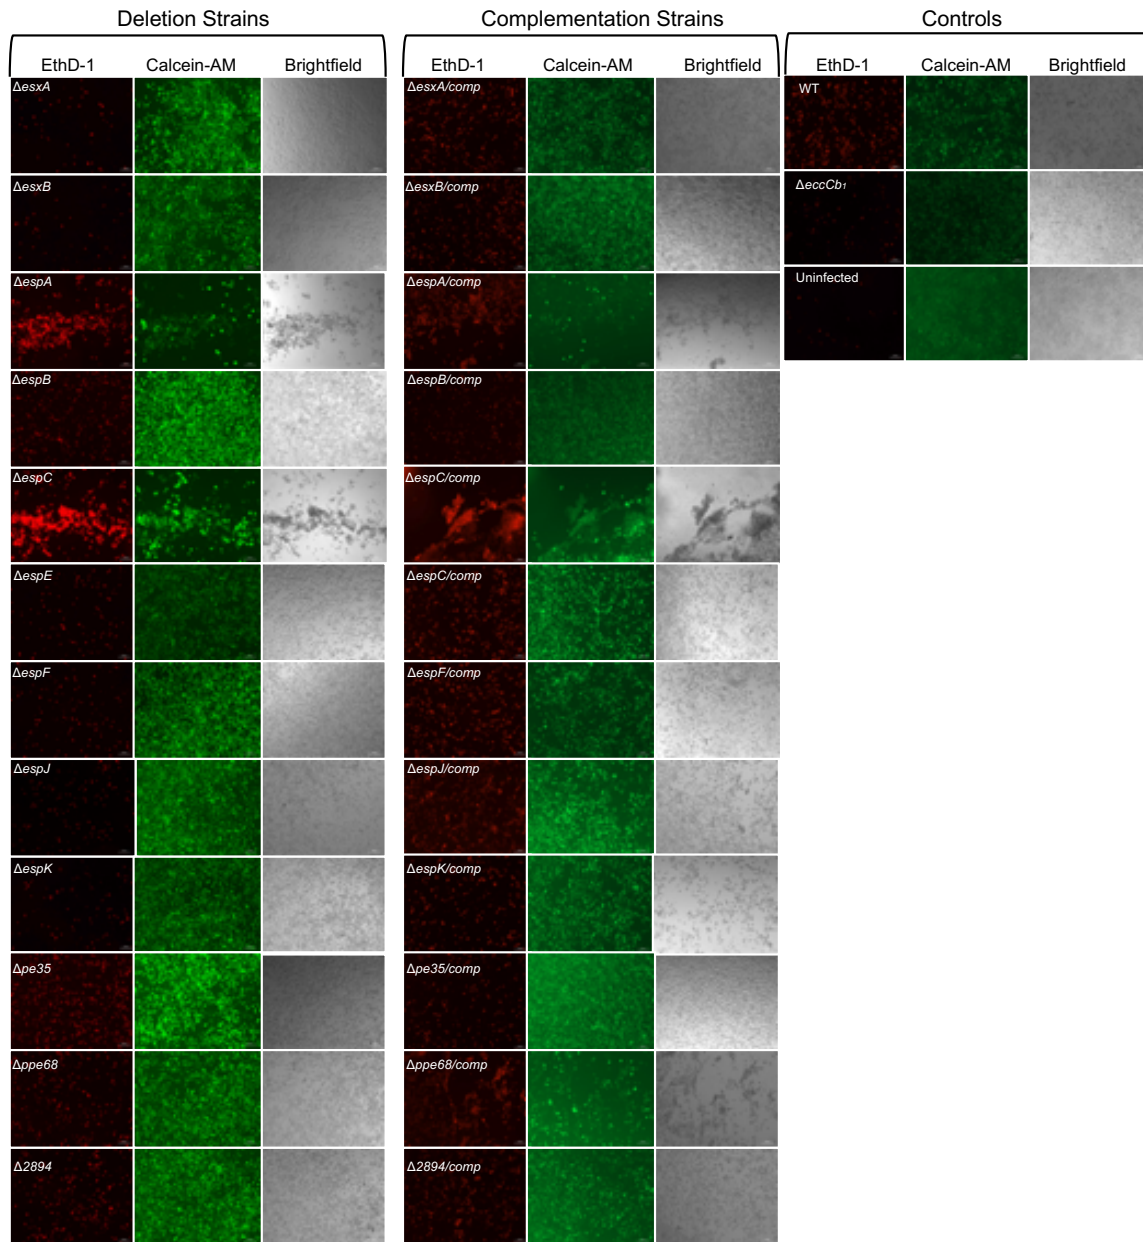

**Figure S3: Images from Live/ Dead analysis of Macrophage Infections** (Related to Figure 1)  
 Representative images for RAW 264.7 macrophage infections from Figure 1C. EthD-1 and all brightfield images were adjusted with +38% brightness to aid in visualization. Scale bar represents 50 $\mu$ m.



# Heatmap

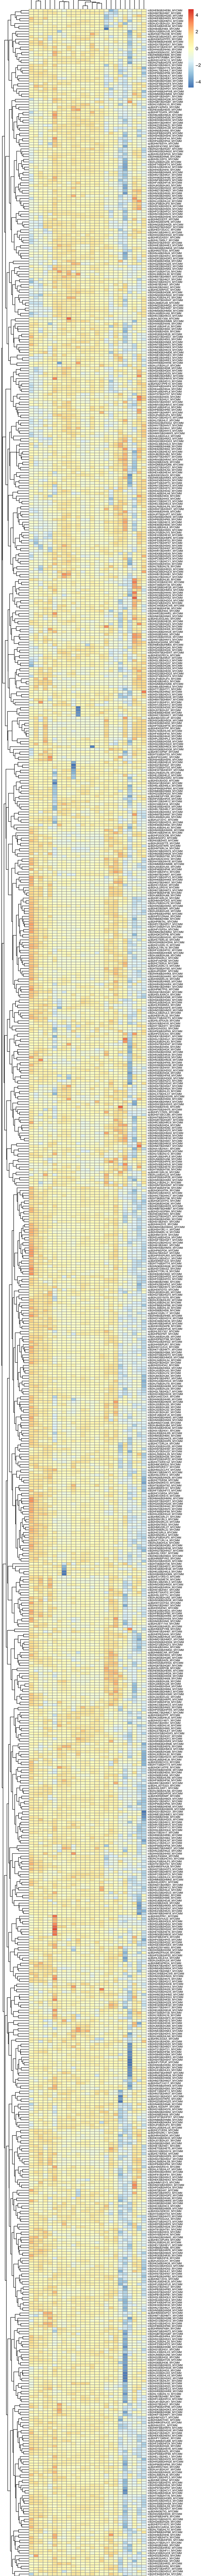



**Figure S4: Readable Heat Map** (Related to Figure 2A). Heatmap generated from the Dataset S1E, using code in the Supplementary Methods. Accession number is shown for each protein.

●  $P \leq 0.05$  ●  $P > 0.05$

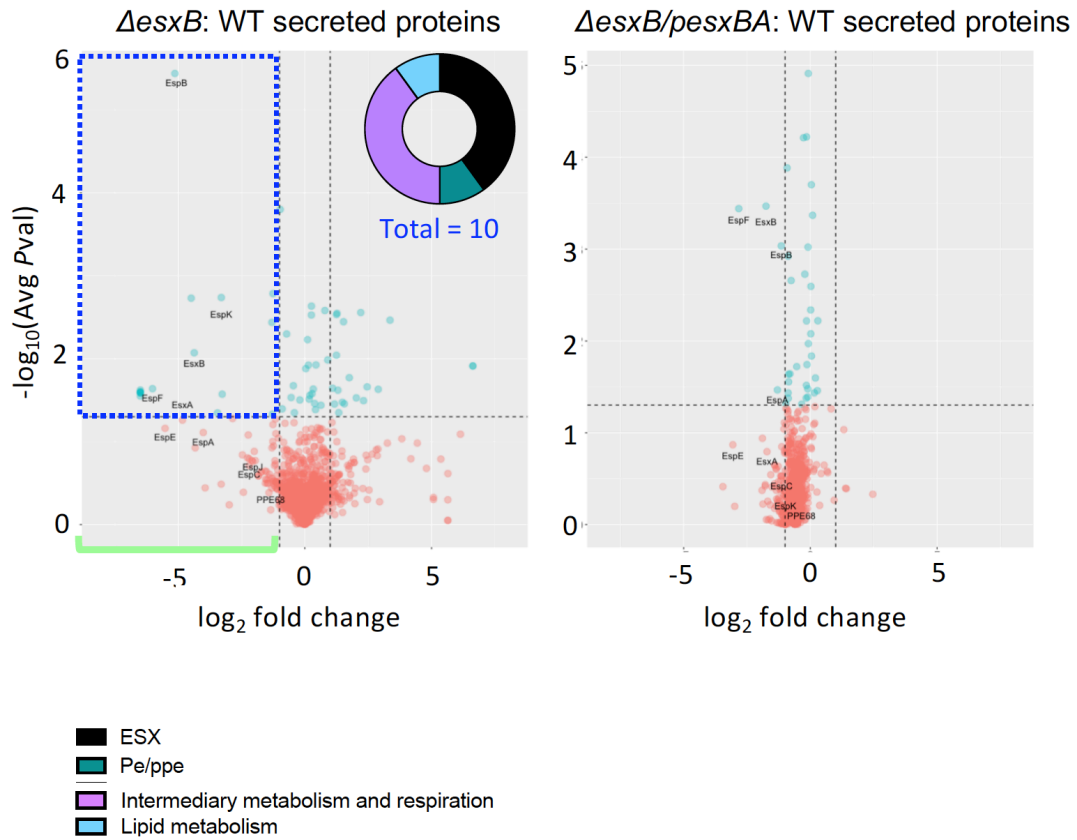

**Figure S5. Analysis of the requirement of *esxB* for protein secretion** (Related to Figure 3B). Volcano plots of proteins measured in the  $\Delta esxB$  and  $\Delta esxB$  complemented strains. The  $\log_2$  fold change of secretion levels from each strain as compared to the WT strain is plotted against the  $\log_{10}$  of the average  $P$  value. Horizontal black dashed line signifies a  $P$  value of .05. Blue dots have a  $P$  value  $\leq .05$ , red dots have a  $P$  value of  $> .05$ . Vertical black dashed lines signify a  $\log_2$  fold change of -1. Known ESX-1 substrates are labeled. The donut plot is a functional analyses of *M. marinum* proteins in the quadrant indicated by the blue dashed lines based upon the functional annotation in Mycobrowser (6). The green bracket at the bottom left of the volcano plot signifies the proteins used in Figure 3B.

| Protein Name | Predicted Functional Category: predicted product    | Conserved protein in <i>M. tb</i> | High confidence structural prediction                                                 |
|--------------|-----------------------------------------------------|-----------------------------------|---------------------------------------------------------------------------------------|
| MMAR_0431    | PE/PGRS; PE-PGRS family protein                     | No                                |    |
| MMAR_3064    | Conserved hypotheticals; conserved membrane protein | No                                |    |
| MMAR_3570    | PE/PPE; PE-PGRS family protein                      | No                                |   |
| MMAR_3763    | PE/PPE; PE-PGRS family protein                      | Rv1450                            |  |
| MMAR_4953    | PE/PPE; PE-PGRS family protein                      | Rv0754                            |  |

**Figure S6 Structural Predictions for non-ESX-1 Core Proteins with N-terminal Helices.** Sequences for each predicted protein were obtained from Mycobrowser (6). Using these sequences, protein structures were predicted using Robetta online user interface, program RoseTTAFold (25). All proteins were modeled in their entirety, except MMAR\_3763. Only the model of the first 1136 amino acids is shown, due to the size of the protein.

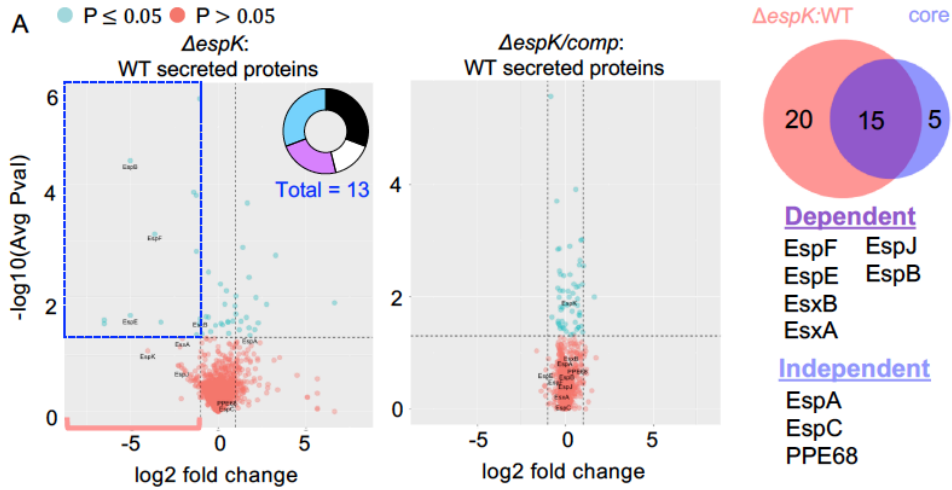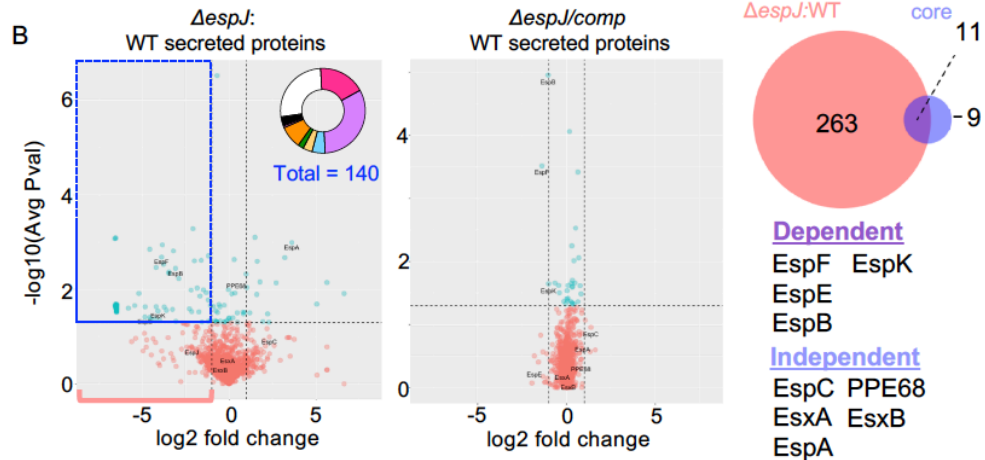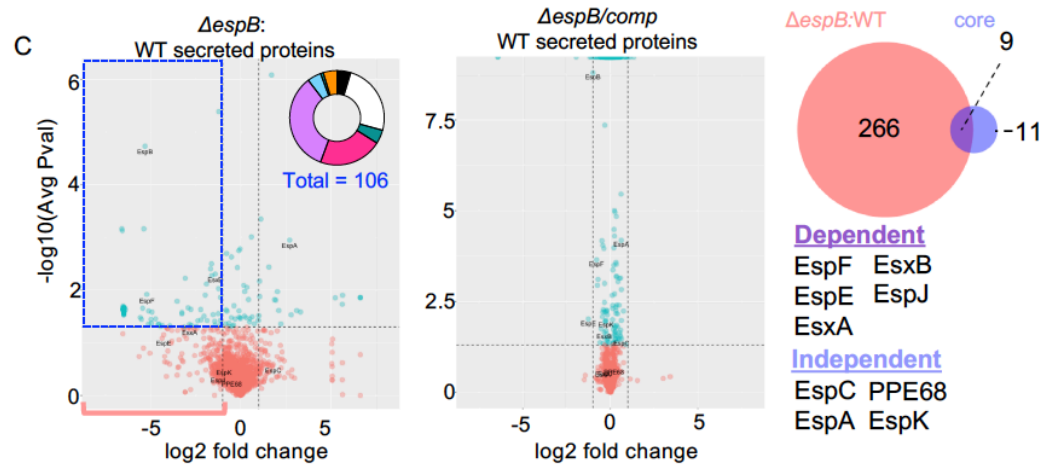

- ESX
- Conserved hypotheticals
- Cell wall and cell processes
- Intermediary metabolism and respiration
- Lipid metabolism
- Virulence, Detoxification, Adaptation
- information pathways
- Regulatory Proteins
- Insertion seqs and phages

**Figure S7. Group II Substrates: Analysis of requirement for protein secretion.** Volcano plots of proteins measured in the **A.**  $\Delta espK$  and  $\Delta espK$  complemented strains, **B.**  $\Delta espJ$  and  $\Delta espJ$  complemented strains and **C.**  $\Delta espB$  and  $\Delta espB$  complemented strains. The  $\log_2$  fold change of secretion levels from each strain as compared to the WT strain is plotted against the  $\log_{10}$  of the average  $P$  value. Horizontal black dashed line signifies a  $P$  value of .05. Blue dots have a  $P$  value  $\leq .05$ , red dots have a  $P > .05$ . Vertical black dashed lines signify a  $\log_2$  fold change of -1, and 1. Known ESX-1 substrates are labeled. The donut plot is a functional analyses of *M. marinum* proteins in the quadrant indicated by the blue dashed lines based upon the functional annotation in Mycobrowser (6). Venn diagrams were generated as described in the Supplemental Materials and Methods.

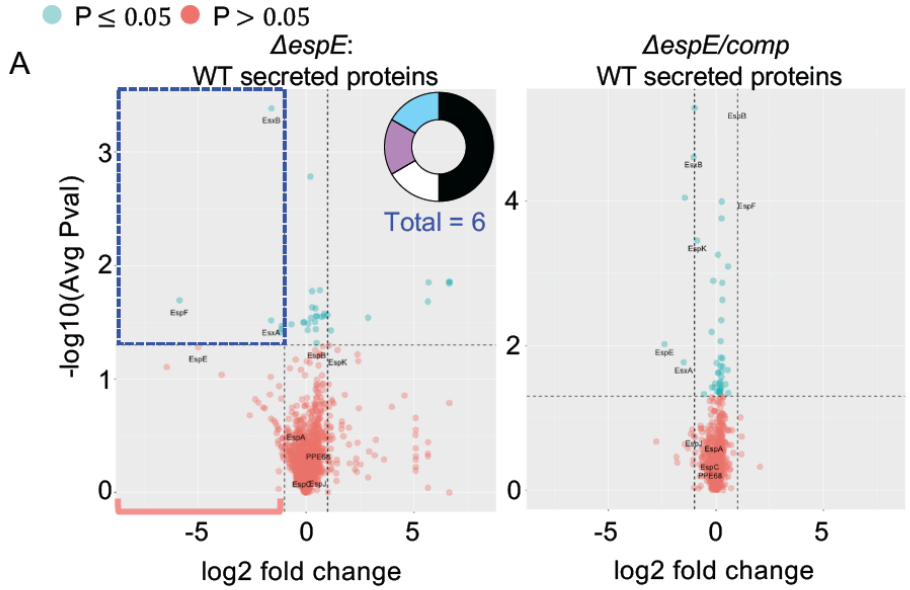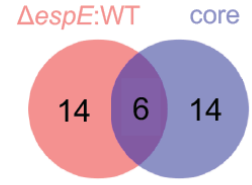

**Dependent**

EspF  
EsxB  
EsxA

**Independent**

EspB EspA  
EspJ EspC  
EspK PPE68

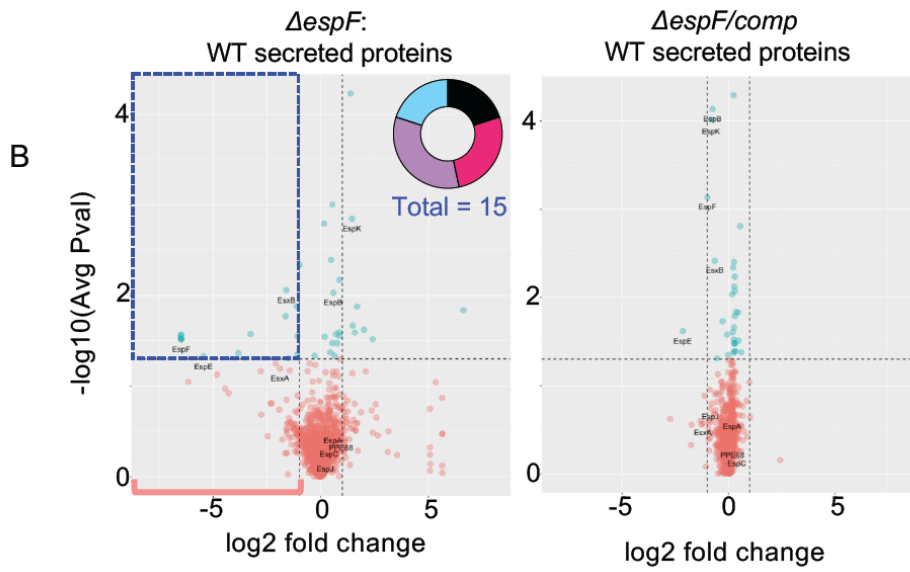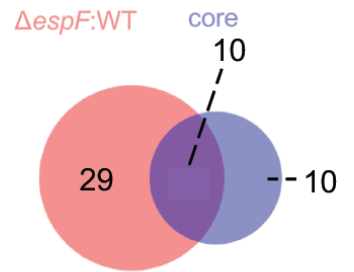

**Dependent**

EsxA  
EsxB  
EspE

**Independent**

EspA EspK  
EspC EspJ  
EspB PPE68

- ESX
- Cell wall and cell processes
- Intermediary metabolism and respiration
- Lipid metabolism
- Conserved hypotheticals



**Figure S8: Group III Substrates: Analysis of requirement for protein secretion.** Volcano plots of proteins measured in the **A.**  $\Delta espE$  and  $\Delta espE$  complemented strains, **B.**  $\Delta espF$  and  $\Delta espF$  complemented strains. The  $\log_2$  fold change of secretion levels from each strain as compared to the WT strain is plotted against the  $\log_{10}$  of the average  $P$  value. Horizontal black dashed line signifies a  $P$  value of .05. Blue dots have a  $P$  value  $\leq .05$ , red dots have a  $P$  value of  $> .05$ . Vertical black dashed lines signify a  $\log_2$  fold change of -1, and 1. Known ESX-1 substrates are labeled. The donut plot is a functional analyses of *M. marinum* proteins in the quadrant indicated by the blue dashed lines based upon the functional annotation in Mycobrowser (6). Venn diagrams were generated as described in the Supplemental Materials and Methods.

●  $P \leq 0.05$  ●  $P > 0.05$

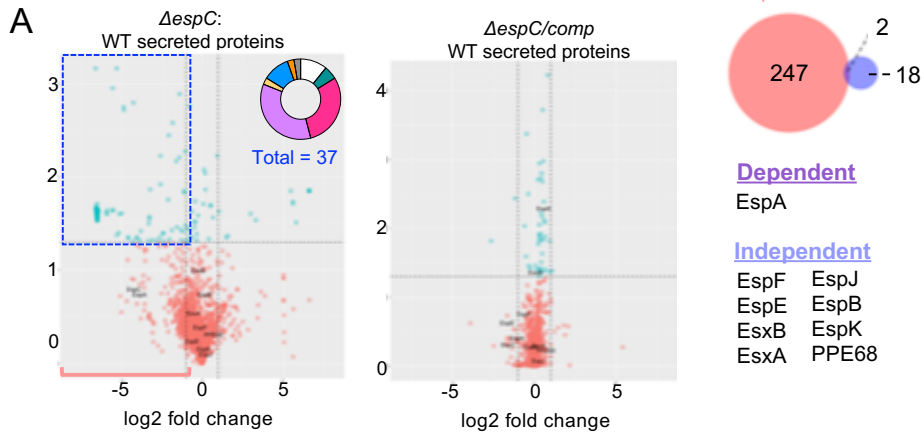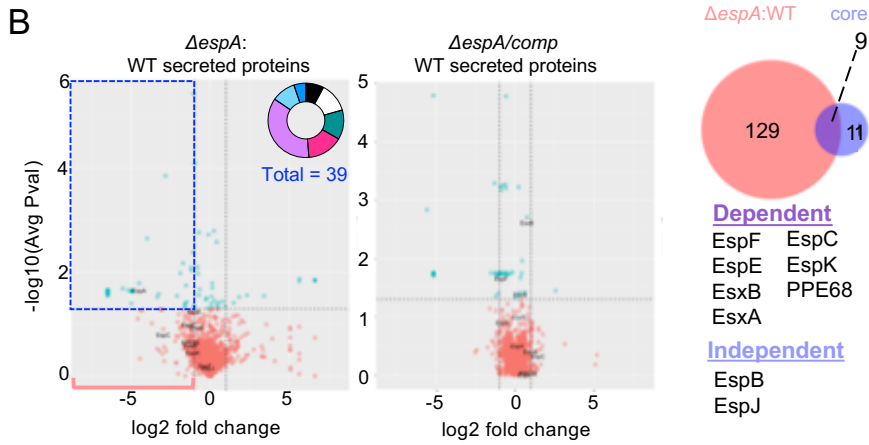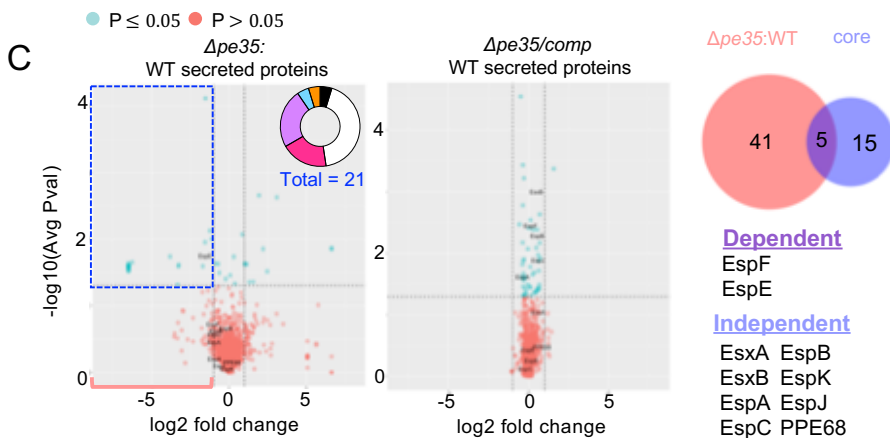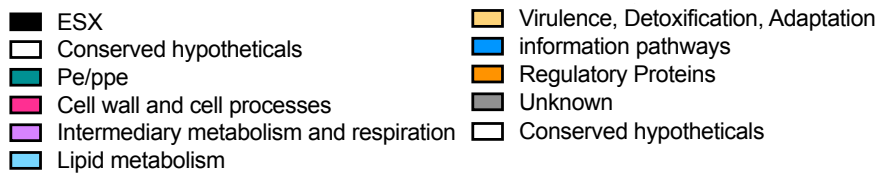

**Figure S9: Group IV Substrates: Analysis of requirement for protein secretion.** Volcano plots of proteins measured in the **A.**  $\Delta espC$  and  $\Delta espC$  complemented strains, **B.**  $\Delta espA$  and  $\Delta espA$  complemented strains, and **C.**  $\Delta pe35$  and  $\Delta pe35$  complemented strains. The  $\log_2$  fold change of secretion levels from each strain as compared to the WT strain is plotted against the  $\log_{10}$  of the average  $P$  value. Horizontal black dashed line signifies a  $P$  value of .05. Blue dots have a  $P$  value  $\leq .05$ , red dots have a  $P$  value of  $> .05$ . Vertical black dashed lines signify a  $\log_2$  fold change of -1, and 1. Known ESX-1 substrates are labeled. The donut plot is a functional analyses of *M. marinum* proteins in the quadrant indicated by the blue dashed lines based upon the functional annotation in Mycobrowser (6). Venn diagrams were generated as described in the Supplemental Materials and Methods.

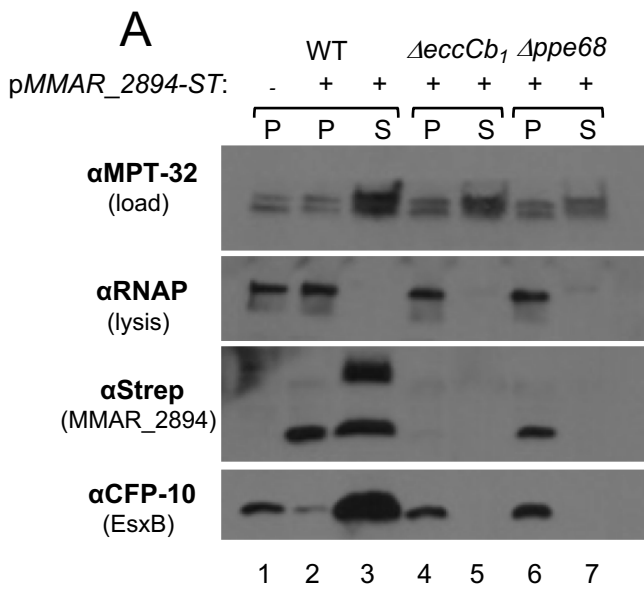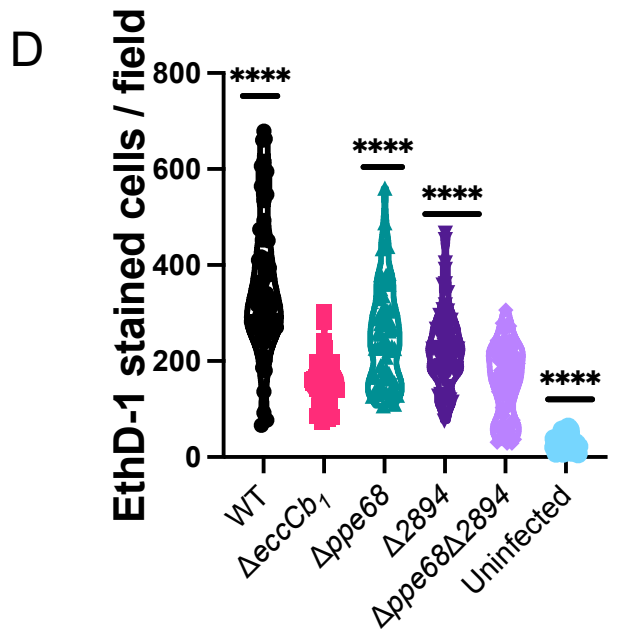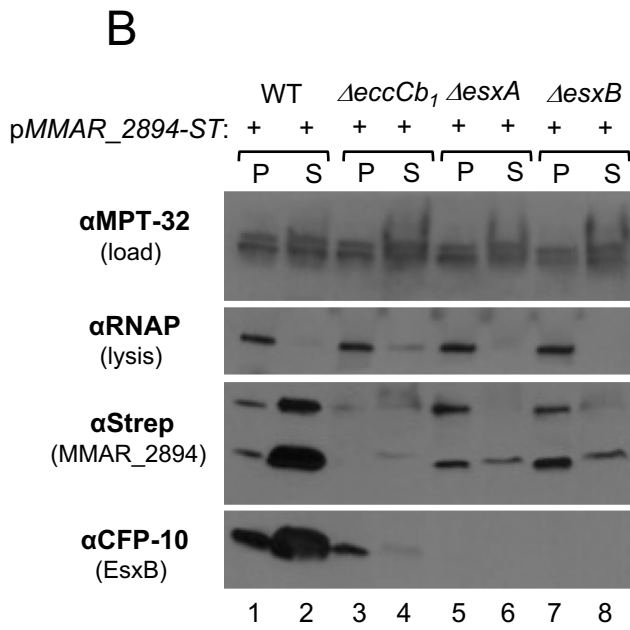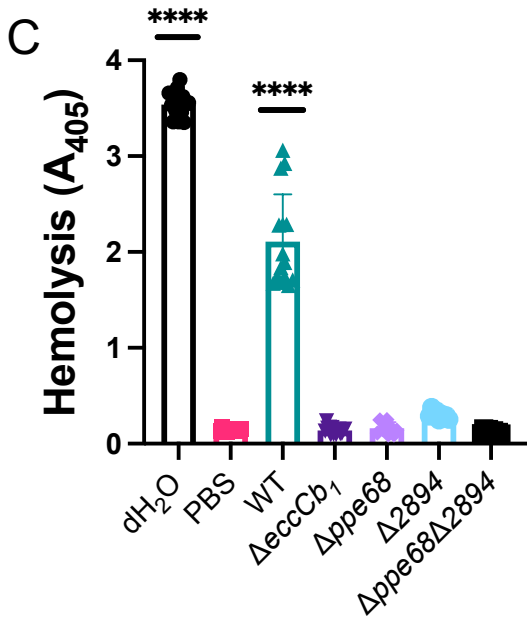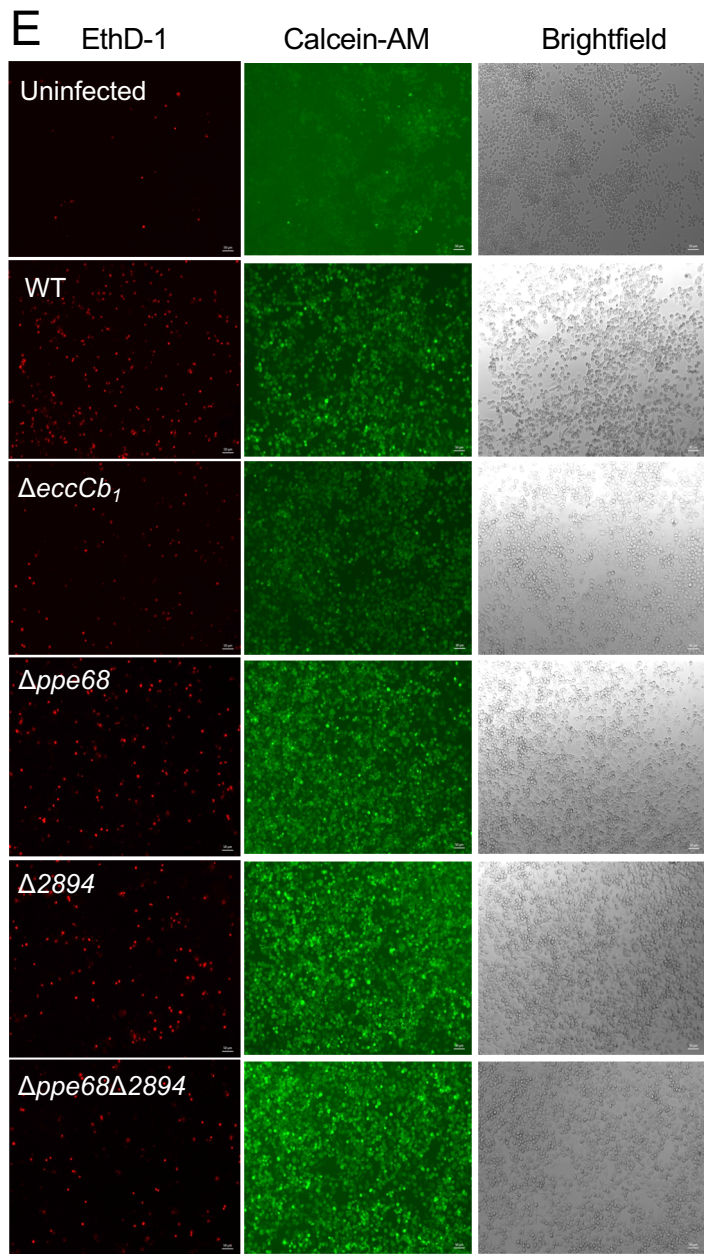

**Figure S10: Supporting data assigning MMAR\_2894 to Group I Substrates.** **A.** PPE68 is required for the secretion of MMAR\_2894-ST. **B.** EsxA and EsxB are dispensable for the secretion of MMAR\_2894-ST. For A and B, secretion assays were performed as described in the Materials and Methods. P= cell-associated fraction, S = secreted fraction. 10µg of protein was loaded in each lane. Western blots are representative of three biological replicates. **C.** Hemolysis assay. Each data point is a technical replicate. Three biological replicates, each in technical triplicate were performed. Error bars represent standard deviation. Significance was determined using an ordinary one-way ANOVA ( $P < .0001$ ), followed by a Tukey's multiple comparison test. Significance is shown relative to the  $\Delta eccCb_1$  strain (\*\*\*\*,  $P < .0001$ ). **D.** Cytolysis assay. Data are the average of at least four biological replicates, each in technical triplicate. EthD-1-stained cells were counted from 5 fields from each well, represented by dots. Statistical significance was determined using a one-way ordinary ANOVA ( $P < .0001$ ) followed by a Tukey's multiple comparison test. Significance shown is compared to the  $\Delta eccCb_1$  strain. The cytolytic activity of the  $\Delta eccCb_1$  strain was not significantly different from  $\Delta ppe68\Delta MMAR_2894$  strain. \*\*\*\*,  $P < .0001$ . **E.** Representative images for RAW 264.7 macrophage infections from panel D. Scale bar represents 50µm.

**Table S1:** Strains and Plasmids used in this study.

| <b>Mycobacterial strains</b>                    |                                                                                                                                                                              |                  |
|-------------------------------------------------|------------------------------------------------------------------------------------------------------------------------------------------------------------------------------|------------------|
| <b>Name</b>                                     | <b>Genotype</b>                                                                                                                                                              | <b>Reference</b> |
| <i>M. marinum</i> M                             | Wild type; parent strain for all strains in this study                                                                                                                       | ATCC:BAA-545     |
| $\Delta eccCb_1$                                | Unmarked deletion of the <i>eccCb_1</i> gene (MMAR_5446)                                                                                                                     | (12)             |
| $\Delta esxA$                                   | Unmarked deletion of the <i>esxA</i> gene (MMAR_5450)                                                                                                                        | This study       |
| $\Delta esxB$                                   | Unmarked deletion of the <i>esxB</i> gene (MMAR_5449)                                                                                                                        | This study       |
| $\Delta espA$                                   | Unmarked deletion of the <i>espA</i> gene (MMAR_4166)                                                                                                                        | This study       |
| $\Delta espB$                                   | Unmarked deletion of the <i>espB</i> gene (MMAR_5457)                                                                                                                        | (8)              |
| $\Delta espC$                                   | Unmarked deletion of the <i>espC</i> gene (MMAR_4167)                                                                                                                        | This study       |
| $\Delta espE$                                   | Unmarked deletion of the <i>espE</i> gene (MMAR_5439)                                                                                                                        | (8)              |
| $\Delta espF$                                   | Unmarked deletion of the <i>espF</i> gene (MMAR_5440)                                                                                                                        | (8)              |
| $\Delta espJ$                                   | Unmarked deletion of the <i>espJ</i> gene (MMAR_5453)                                                                                                                        | (8)              |
| $\Delta espK$                                   | Unmarked deletion of the <i>espK</i> gene (MMAR_5455)                                                                                                                        | (8)              |
| $\Delta pe35$                                   | Unmarked deletion of the <i>pe35</i> gene (MMAR_5447)                                                                                                                        | This study       |
| $\Delta ppe68$                                  | Unmarked deletion of the <i>ppe68</i> gene (MMAR_5448)                                                                                                                       | This study       |
| $\Delta MMAR_2894$                              | Unmarked deletion of the <i>MMAR_2894</i> gene                                                                                                                               | (4)              |
| WT/pMV306                                       | M strain with pMV306 empty vector integrated at <i>attB</i>                                                                                                                  | This study       |
| $\Delta eccCb_1$ /pMV306                        | $\Delta eccCb_1$ with pMV306 empty vector integrated at <i>attB</i>                                                                                                          | This study       |
| $\Delta esxA$ /p <sub>MOP</sub> _esxBA          | $\Delta esxA$ with p <sub>MOP</sub> _esxBA integrated at <i>attB</i>                                                                                                         | This study       |
| $\Delta esxB$ /p <sub>MOP</sub> _esxBA          | $\Delta esxB$ with p <sub>MOP</sub> _esxBA integrated at <i>attB</i>                                                                                                         | This study       |
| $\Delta espA$ /p <sub>MOP</sub> _espA           | $\Delta espA$ with p <sub>MOP</sub> _espA integrated at <i>attB</i>                                                                                                          | This study       |
| $\Delta espB$ /p <sub>MOP</sub> _espB           | $\Delta espB$ with p <sub>MOP</sub> _espB integrated at <i>attB</i>                                                                                                          | This study       |
| $\Delta espC$ /p <sub>MOP</sub> _espC           | $\Delta espC$ with p <sub>MOP</sub> _espC integrated at <i>attB</i>                                                                                                          | This study       |
| $\Delta espE$ /pMV306_EFG <sub>MM</sub>         | $\Delta espE$ with pMV306_espEFG <sub>MM</sub> integrated at <i>attB</i>                                                                                                     | (8)              |
| $\Delta espF$ /pMV306_EFG <sub>MM</sub>         | $\Delta espF$ with pMV306_espEFG <sub>MM</sub> integrated at <i>attB</i>                                                                                                     | (8)              |
| $\Delta espJ$ /p <sub>MOP</sub> _espJ           | $\Delta espJ$ with p <sub>MOP</sub> _espJ integrated at <i>attB</i>                                                                                                          | This study       |
| $\Delta espK$ /p <sub>MOP</sub> _espK           | $\Delta espK$ with p <sub>MOP</sub> _espK integrated at <i>attB</i>                                                                                                          | This study       |
| $\Delta pe35$ /p <sub>MOP</sub> _pe35           | $\Delta pe35$ with p <sub>MOP</sub> _pe35 integrated at <i>attB</i>                                                                                                          | This study       |
| $\Delta ppe68$ /p <sub>MOP</sub> _ppe68         | $\Delta ppe68$ with p <sub>MOP</sub> _ppe68 integrated at <i>attB</i>                                                                                                        | This study       |
| $\Delta MMAR2894$ /p <sub>MOP</sub> _2894-strep | $\Delta 2894$ with p <sub>MOP</sub> _2894 Strep-tag integrated at <i>attB</i>                                                                                                | (4)              |
| WT/p <sub>MOP</sub> _2894-strep                 | M strain with p <sub>MOP</sub> _2894 Strep-tag integrated at <i>attB</i>                                                                                                     | (4)              |
| $\Delta eccCb_1$ /p <sub>MOP</sub> _2894-strep  | $\Delta eccCb_1$ with p <sub>MOP</sub> _2894 Strep-tag integrated at <i>attB</i>                                                                                             | (4)              |
| $\Delta esxA$ /p <sub>MOP</sub> _2894-strep     | $\Delta esxA$ with p <sub>MOP</sub> _2894 Strep-tag integrated at <i>attB</i>                                                                                                | This study       |
| $\Delta esxB$ /p <sub>MOP</sub> _2894-strep     | $\Delta esxB$ with p <sub>MOP</sub> _2894 Strep-tag integrated at <i>attB</i>                                                                                                | This study       |
| $\Delta ppe68$ /p <sub>MOP</sub> _2894-strep    | $\Delta ppe68$ with p <sub>MOP</sub> _2894 Strep-tag integrated at <i>attB</i>                                                                                               | This study       |
| $\Delta ppe68\Delta MMAR2894$                   | Unmarked deletion of the <i>ppe68</i> (MMAR_5448) and <i>MMAR_2894</i> genes                                                                                                 | This study       |
| <b>Plasmids Used in This Study</b>              |                                                                                                                                                                              |                  |
| <b>Name</b>                                     | <b>Genotype</b>                                                                                                                                                              | <b>Reference</b> |
| p2NIL                                           | kan <sup>R</sup> , amp <sup>R</sup> , oriE; Parental vector for allelic exchange                                                                                             | (11)             |
| pGOAL19                                         | amp <sup>R</sup> , contains the selectable GOAL cassette includes hyg <sup>R</sup> , lacZ <sup>+</sup> , sacB, oriE; The GOAL cassette is integrated into the p2NIL plasmid. | (11)             |

|                                              |                                                                                                                                                                                          |            |
|----------------------------------------------|------------------------------------------------------------------------------------------------------------------------------------------------------------------------------------------|------------|
| p2NIL $\Delta$ <i>eccCb<sub>1</sub></i> GOAL | Allelic exchange plasmid to generate the $\Delta$ <i>eccCb<sub>1</sub></i> strain; contains <i>M. marinum eccCb<sub>1</sub></i> flanking regions (NC 010612.1:6586249...6587725;6591053) | (12)       |
| p2NIL $\Delta$ <i>esxA</i> GOAL              | Allelic exchange plasmid to generate the $\Delta$ <i>esxA</i> strain; contains <i>M. marinum esxA</i> flanking regions (NC010612.1:6589566...6591514;6591764...6593330)                  | This study |
| p2NIL $\Delta$ <i>esxB</i> GOAL              | Allelic exchange plasmid to generate the $\Delta$ <i>esxB</i> strain; contains <i>M. marinum esxB</i> flanking regions (NC010612.1:6589566...6591175;6591443...6593330)                  | This study |
| p2NIL $\Delta$ <i>espA</i> GOAL              | Allelic exchange plasmid to generate the $\Delta$ <i>espA</i> strain; contains <i>M. marinum espA</i> flanking regions (NC010612.1:5126969...5128565;5129726...5131224)                  | This study |
| p2NIL $\Delta$ <i>espB</i> GOAL              | Allelic exchange plasmid to generate the $\Delta$ <i>espB</i> strain; contains <i>M. marinum espB</i> flanking regions (NC010612.1:6599907...6601456;6602820...6604411)                  | (8)        |
| p2NIL $\Delta$ <i>espC</i> GOAL              | Allelic exchange plasmid to generate the $\Delta$ <i>espC</i> strain; contains <i>M. marinum espC</i> flanking regions (NC010612.1:5128342...5129806;5130089...5131424)                  | This study |
| p2NIL $\Delta$ <i>espE</i> GOAL              | Allelic exchange plasmid to generate the $\Delta$ <i>espE</i> strain; contains <i>M. marinum espE</i> flanking regions (NC 010612:6577412...6579158;6580390...6582018)                   | (8)        |
| p2NIL $\Delta$ <i>espF</i> GOAL              | Allelic exchange plasmid to generate the $\Delta$ <i>espF</i> strain; contains <i>M. marinum espF</i> flanking regions (NC 010612:6579019...6580518;6580805...6582166)                   | (8)        |
| p2NIL $\Delta$ <i>espJ</i> GOAL              | Allelic exchange plasmid to generate the $\Delta$ <i>espJ</i> strain; contains <i>M. marinum espJ</i> flanking regions (NC010612.1:6594681...6596198;6597034...6598635)                  | (8)        |
| p2NIL $\Delta$ <i>espK</i> GOAL              | Allelic exchange plasmid to generate the $\Delta$ <i>espK</i> strain; contains <i>M. marinum espK</i> flanking regions (NC 010612.1:658234...6596734;6600663...6599170)                  | (8)        |
| p2NIL $\Delta$ <i>pe35</i> GOAL              | Allelic exchange plasmid to generate the $\Delta$ <i>pe35</i> strain; contains <i>M. marinum pe35</i> flanking regions (NC010612.1:6587990...6589642;6589904...6591577)                  | This study |
| p2NIL $\Delta$ <i>ppe68</i> GOAL             | Allelic exchange plasmid to generate the $\Delta$ <i>ppe68</i> strain; contains <i>M. marinum ppe68</i> flanking regions (NC 010612.1:6588436...6589954;6591055...6592631)               | This study |
| p2NIL $\Delta$ 2894GOAL                      | Allelic exchange plasmid to generate the $\Delta$ 2894 strain; contains <i>M. marinum</i> 2894 flanking regions (NC 010612.1:3500899...3499384;3498720...3497211)                        | (4)        |
| pMV306Hyg                                    | Promoterless shuttle vector, oriE, L5 integrase, hygR . attB integration.                                                                                                                | (26)       |
| pMOP_ <i>esxBA</i>                           | <i>M. marinum esxB</i> and <i>esxA</i> genes behind the pMOP promoter. <i>hyg<sup>R</sup></i> . attB integration.                                                                        | (27)       |
| pMOP_ <i>espA</i>                            | <i>M. marinum espA</i> gene behind the pMOP promoter. <i>hyg<sup>R</sup></i> . attB integration.                                                                                         | This study |
| pMOP_ <i>espB</i>                            | <i>M. marinum espB</i> gene behind the pMOP promoter. <i>hyg<sup>R</sup></i> . attB integration.                                                                                         | This study |
| pMOP_ <i>espC</i>                            | <i>M. marinum espC</i> gene behind the pMOP promoter. <i>hyg<sup>R</sup></i> . attB integration.                                                                                         | This study |

|                          |                                                                                                                                                                                                |            |
|--------------------------|------------------------------------------------------------------------------------------------------------------------------------------------------------------------------------------------|------------|
| pMV306_EFG <sub>MM</sub> | <i>espE</i> , <i>espF</i> , <i>espG</i> genes from <i>M. marinum</i> (NC 010612.1:6577497...6581787) in pMV306. <i>oriE</i> , L5 integrase, <i>hyg</i> <sup>R</sup> . <i>attB</i> integration. | (8)        |
| pMOP_espJ                | <i>M. marinum</i> <i>espJ</i> gene behind the pMOP promoter. <i>hyg</i> <sup>R</sup> . <i>attB</i> integration.                                                                                | This study |
| pMOP_espK                | <i>M. marinum</i> <i>espK</i> gene behind the pMOP promoter. <i>hyg</i> <sup>R</sup> . <i>attB</i> integration.                                                                                | This study |
| pMOP_pe35                | <i>M. marinum</i> <i>pe35</i> gene behind the pMOP promoter. <i>hyg</i> <sup>R</sup> . <i>attB</i> integration.                                                                                | This study |
| pMOP_ppe68               | <i>M. marinum</i> <i>ppe68</i> gene behind the pMOP promoter. <i>hyg</i> <sup>R</sup> . <i>attB</i> integration.                                                                               | This study |
| pMOP_2894-strep          | <i>M. marinum</i> 2894 gene, 3' streptactin-tagged behind the pMOP promoter. <i>hyg</i> <sup>R</sup> . <i>attB</i> integration.                                                                | (4)        |



**Table S2:** Oligonucleotides used in this study.

| Name   | Sequence (5'→3')                                                       | Application & Reference                                                                       |
|--------|------------------------------------------------------------------------|-----------------------------------------------------------------------------------------------|
| orb48  | TGGTGTACGCTCGTGTCCAGCACCGAAC                                           | Amplifying flanking regions for <i>eccCb<sub>1</sub></i> knockout, (27)                       |
| orb49  | GTGATGCGTCGCTGGCAATGAAATAATCCTAA<br>CCGGGGCTAGGTTCCGGCAGTCATGAGC       |                                                                                               |
| orb50  | AGCCCCGGTTAGGATTATTTTC                                                 |                                                                                               |
| orb51  | GCAGTCAGGCACCGTTCGTATCCCAGTCGTCTTC                                     |                                                                                               |
| omf166 | CGTGGTGTACGCTCGTGCACAAATGAGGATTTGTCC                                   |                                                                                               |
| omf563 | CCGTGACCTTAAGCCACTGCTGTTCTGTCATGTCGTATTGC                              | Amplifying flanking regions for <i>esxA</i> knockout, this study                              |
| omf564 | AGCAGTGGCTTAAGGTCACGGGGATGTTTGCTTAATCCCC                               |                                                                                               |
| omf169 | CGCAGTCAGGCACCGTGTTCGCCTCATCGGCTCG                                     |                                                                                               |
| omf561 | TTGCGACTTAAGGGTCTTCATCTCTGCCATGCTGG                                    |                                                                                               |
| omf562 | GAAGACCCTTAAGTCGCAAATGGGCTTCTGATTCC                                    | Used with omf166 and omf169, amplifying flanking regions for <i>esxB</i> knockout, this study |
| olc11  | TGGTGTACGCTCGTGCCAAATCGCAGCGCTCTAC                                     | Amplifying flanking regions for <i>espA</i> knockout, this study                              |
| orc19  | GGGGCTAGCCTTAAGTCATGGCTACTACCTGCCAAC                                   |                                                                                               |
| orc20  | TAGCCATGACTTAAGGCTAGCCCCACCTGACC                                       |                                                                                               |
| orc21  | GCAGTCAGGCACCGTGATTTCCGCGTAGTCGTG                                      |                                                                                               |
| omf210 | CGTGGTGTACGCTCGTCTGACGCTGGTGCTCGGATTGG                                 | Amplifying flanking regions for <i>espB</i> knockout, (8)                                     |
| omf211 | GTCCTGACGCTTAAGCTGCGGCTGGCTCATGTCGG                                    |                                                                                               |
| omf212 | CAGCCGCAGCTTAAGCGTCAGGACAACAAGTAGCCGTCAGG                              |                                                                                               |
| omf213 | ACGCAGTCAGGCACCGTGAGTACCCGGGATACCCGGGATACC                             |                                                                                               |
| orb42  | TGGTGTACGCTCGTAGCAACCCGACACGACTC                                       | Amplifying flanking regions for <i>espC</i> knockout, this study                              |
| orb43  | GAATAACGACTTAAGCAGGTTCTCCGTCATTGGTG                                    |                                                                                               |
| orb44  | CTTAAGTCGTTATTCAGCTGAACAGC                                             |                                                                                               |
| orb45  | GCAGTCAGGCACCGTAAATCGTCGCGGGTGATCAG                                    |                                                                                               |
| olc179 | CGTGGTGTACGCTCGTTCTGCCGAGGATCGTATAG                                    |                                                                                               |
| olc180 | CTAGAGGAGGGTCTTAAGCTTTGGCACCATTTCGCG                                   |                                                                                               |
| olc181 | ATGGTGCCAAAGCTTAAGACCCTCCTCTAGTCCGGGC                                  |                                                                                               |
| olc182 | CGCAGTCAGGCACCGTAAGATCTTTCGGCCAGAGC                                    |                                                                                               |
| orb34  | TGGTGTACGCTCGTAAAGTGCCCGCACTACCAAG                                     | Amplifying flanking regions for <i>espF</i> knockout, (8)                                     |
| orb35  | GCAGTCAGGCACCGTCGGCAAGTTGAGCGTCATAC                                    |                                                                                               |
| orb36  | GGTAGCGAGCGGACCGGTCATATCAGCCAAAA                                       |                                                                                               |
| orb37  | ATCTTGTCCTTAAGGTTTCAGTAGTCTGTGTCATGG CTTAAGGACAA-<br>GATTTTTGGCTGATATG |                                                                                               |
| omf435 | CGTGGTGTACGCTCGTACGAGACCGTCGCGATCTTGGCC                                |                                                                                               |
| omf436 | CGCTCTTAAGCAGAGGCTCAGCCATCGCAGAATCCC                                   |                                                                                               |
| omf437 | CCTCTGCTTAAGAGCGCTCCCGTCGAAAGCACCG                                     |                                                                                               |
| omf438 | ACGCAGTCAGGCACCGTGAGACCGAAGATCTGCGGCTGCTGG                             |                                                                                               |
| omf457 | CGTGGTGTACGCTCGTTCGATGGACCAGCAGAAGGAGTGG                               | Amplifying flanking regions for <i>espK</i> knockout, (8)                                     |
| omf458 | AAGCAGCTTAAGCGGCCTCGGAATACCCATTGC                                      |                                                                                               |
| omf459 | GGCCGCTTAAGCTGCTTGCCAACGCTTTGGCGG                                      |                                                                                               |
| omf460 | ACGCAGTCAGGCACCGTGCACAGCTCGTCTCGGACACCAAACC                            |                                                                                               |
| omf520 | CGTGGTGTACGCTCGTCTGCAGACGTTGGTCATGTCGG                                 |                                                                                               |
| omf521 | GACGCTCTTAAGGCCGTGTGACTTTTGTTCATTTC                                    |                                                                                               |

|        |                                                     |                                                                                         |
|--------|-----------------------------------------------------|-----------------------------------------------------------------------------------------|
| omf522 | CACGGCCTTAAGAGCGTCATCGTGTAGAAAATCAGTCACC            | Amplifying flanking regions for <i>pe35</i> knock-out, this study                       |
| omf523 | ACGCAGTCAGGCACCGTGGAATGAATGCTGGTGACATTTCCC          |                                                                                         |
| olc198 | TGGTGTACAGCTCGTCTACCTGGGCACCAAGATCG                 | Amplifying flanking regions for <i>ppe68</i> knockout, this study                       |
| olc199 | CAGTCGTCTTAAGGTGCCACAGCATGGTGATCAC                  |                                                                                         |
| olc200 | CTGTGGCACCTTAAGGACGACTGGTGAGCGTCGTC                 |                                                                                         |
| olc201 | GCAGTCAGGCACCGTTAGCGGTGACTTCGGTGGTG                 |                                                                                         |
| orb130 | TGGTGTACAGCTCGTCCATCGCATAAAGCGCTGTC                 | Amplifying flanking regions for 2894 knock-out, (4)                                     |
| orb131 | TGACATGGGATCCATTTGCACG                              |                                                                                         |
| orb132 | AATGGATCCCATGTCCAGAACGCTTGATGTAGCGGGC               |                                                                                         |
| orb133 | GCAGTCAGGCACCGTTGCCACCCGAATAGGCTAGG                 |                                                                                         |
| omf170 | TCGTCAACACGAACAGACTTTCCC                            | Verification of $\Delta$ <i>esxA</i> and $\Delta$ <i>esxB</i> strains, this study       |
| omf171 | GTCATCTGGAGGTCCGGAACC                               |                                                                                         |
| orc34  | TTGATCACCAAGCCGAGGAC                                | Verification of $\Delta$ <i>espA</i> strain, this study                                 |
| orc35  | TTAGCCCAGAGGTGACTTCCG                               |                                                                                         |
| omf214 | TAATCGGCGAGACCGTGAACC                               | Verification of $\Delta$ <i>espB</i> strain, this study                                 |
| omf215 | GTCCAAGGCCGACTGGAACC                                |                                                                                         |
| olc9   | GCGACCAGCAAGAAGTACTC                                | Verification of $\Delta$ <i>espC</i> strain, this study                                 |
| olc10  | GTCGAGCATGGCGAAGTTGG                                |                                                                                         |
| olc183 | ACGGTCGGAGCACTGCTAAG                                | Verification of $\Delta$ <i>espE</i> strain, this study                                 |
| olc184 | TCGGTCTCGTCTGCTCAGTTC                               |                                                                                         |
| olc1   | TGGCAACTCACCTTGAATCG                                | Verification of $\Delta$ <i>espF</i> strain, this study                                 |
| olc2   | TACCTCGACTCCGACGACATC                               |                                                                                         |
| omf439 | AAACATCCGATTCTGAGTCACCGGC                           | Verification of $\Delta$ <i>espJ</i> strain, this study                                 |
| omf440 | GTTGGATGTCGCCGGTAACACC                              |                                                                                         |
| omf461 | GTACCACTGACCAGCTGACGCG                              | Verification of $\Delta$ <i>espK</i> strain, this study                                 |
| omf462 | ATAACTTACTTTTGAAAAACGCACTGGCAGCG                    |                                                                                         |
| omf524 | GATTATTTTATTGCCAGCGACGCATCACCC                      | Verification of $\Delta$ <i>pe35</i> strain, this study                                 |
| omf525 | AGTTCAAGCGCGCGGTCAATTCCG                            |                                                                                         |
| orc32  | GCTCAGCGGGAGATCCACC                                 | Verification of $\Delta$ <i>ppe68</i> strain, this study                                |
| orc33  | CGGAGATCCGCTCGAAATTACCTG                            |                                                                                         |
| orb150 | TCGTATGCGACGGCTGTTTG                                | Verification of $\Delta$ <i>MMAR_2894</i> strain, (4)                                   |
| orb151 | TTGGCGACGGTCTTGAACCC                                |                                                                                         |
| orb38  | ATTCAGGAGTCCAGCATGGCAGAGATGAAGACCGATG               | Amplifying the <i>esxBA</i> genes for $p_{MOP\_esxBA}$ plasmid construction, this study |
| orb39  | GCCTGAGCGGTCCCGTTAAGCAAACATCCCCGTGAC                |                                                                                         |
| occ86  | AGGAGTCCAGCCATATGAGCAGAGCCTTCATCATCGATCCCAC-GATTAGC | Amplifying the <i>espA</i> gene for $p_{MOP\_espA}$ plasmid construction, this study    |
| occ87  | GCCTGAGCGGTCCCGACTAGTCTAGCCGGCGCGTCTCGTCCG          |                                                                                         |
| occ94  | AGGAGTCCAGCCATATGACGGAGAACCCTGAAAGTGCAGCC           | Amplifying the <i>espC</i> gene for $p_{MOP\_espC}$ plasmid construction, this study    |
| occ95  | GAGCGGTCCCGACTAGTTCAGCTGAATAACGATCCGAGCGCC          |                                                                                         |

|        |                                                    |                                                                                                            |
|--------|----------------------------------------------------|------------------------------------------------------------------------------------------------------------|
| omf301 | TTCAGGAGTCCAGCCATATGAGCCAGCCGCGAGACCGTC            | Amplifying the <i>espB</i> gene for p <sub>MOP_espB</sub> plasmid construction, this study                 |
| omf302 | CGAACTGCGGGTGGCTCCATCCCTACTTGTGTCCTGAC-GGCGGCG     |                                                                                                            |
| olc7   | GAGTGAGCTGATACCGGCGCGATGGGCCATGATAAG               | Amplifying <i>M. marinum</i> <i>espE-espG</i> genes for pMV306_EFG <sub>MM</sub> plasmid construction, (8) |
| olc8   | ATTCTGCAGCTGGATAGTGCACCGAGTCCAGAGTC                |                                                                                                            |
| omf477 | AGGAGTCCAGCCATATGGCTGAGCCTCTGGCCGTCG               | Amplifying the <i>espJ</i> gene for p <sub>MOP_espJ</sub> plasmid construction, this study                 |
| omf478 | ACGCCTGAGCGGTCCCGACTAGTCAGATCGGAGCTGAGAC-CGAACCC   |                                                                                                            |
| omf479 | AGGAGTCCAGCCATATGGGTATTCCGAGGCCGACGGG              | Amplifying the <i>espK</i> gene for p <sub>MOP_espK</sub> plasmid construction, this study                 |
| omf480 | ACGCCTGAGCGGTCCCGACTAGTCAGGACGCGTCCGCCAAAGC        |                                                                                                            |
| okn27  | AGGAGTCCAGCCATATGGAACAAAAGTCACACG                  | Amplifying the <i>pe35</i> gene for p <sub>MOP_pe35</sub> plasmid construction, this study                 |
| okn28  | GCCTGAGCGGTCCCGACTAGTCTACACGATGACGCTGG             |                                                                                                            |
| occ88  | AGGAGTCCAGCCATATGCTGTGGCACGCAATGCCACC              | Amplifying the <i>ppe68</i> gene for p <sub>MOP_ppe68</sub> plasmid construction, this study               |
| occ89  | GCCTGAGCGGTCCCGACTAGTTCACCAG-TCGTCCTCGTCATCCCAGTCG |                                                                                                            |
| orb74  | CAGGAGTCCAGCCATATGGATCCCATGTCACACGACC              | Amplifying the <i>MMAR_2894-ST</i> gene for p <sub>MOP_2894-ST</sub> plasmid construction, (4)             |
| orb75  | TGCGGGTGGCTCCATCCCATCAAGCGTTCGACCGGG               |                                                                                                            |

**Table S3: LC-MS/MS Sample Key, Labeling Table**

| Biological Replicate | Strain               | Sample ID | iTRAQ Reporter |
|----------------------|----------------------|-----------|----------------|
| Deletion 1           | M Strain (WT) 1      | a-1       | 113            |
| Deletion 1           | M Strain (WT) 2      | a-A       | 113            |
| Deletion 1           | $\Delta eccCb_1$ 1   | a-1       | 114            |
| Deletion 1           | $\Delta eccCb_1$ 2   | a-A       | 114            |
| Deletion 1           | $\Delta MMAR_{2894}$ | a-1       | 115            |
| Deletion 1           | $\Delta espA$        | a-A       | 115            |
| Deletion 1           | $\Delta espB$        | a-A       | 116            |
| Deletion 1           | $\Delta espC$        | a-A       | 117            |
| Deletion 1           | $\Delta espE$        | a-A       | 118            |
| Deletion 1           | $\Delta espF$        | a-1       | 116            |
| Deletion 1           | $\Delta espJ$        | a-1       | 117            |
| Deletion 1           | $\Delta espK$        | a-1       | 118            |
| Deletion 1           | $\Delta esxA$        | a-1       | 119            |
| Deletion 1           | $\Delta esxB$        | a-1       | 121            |
| Deletion 1           | $\Delta pe35$        | a-A       | 119            |
| Deletion 1           | $\Delta ppe68$       | a-A       | 121            |
| Deletion 2           | M Strain (WT) 1      | b-1       | 113            |
| Deletion 2           | M Strain (WT) 2      | b-A       | 113            |
| Deletion 2           | $\Delta eccCb_1$ 1   | b-1       | 114            |
| Deletion 2           | $\Delta eccCb_1$ 2   | b-A       | 114            |
| Deletion 2           | $\Delta MMAR_{2894}$ | b-1       | 115            |
| Deletion 2           | $\Delta espA$        | b-1       | 116            |
| Deletion 2           | $\Delta espB$        | b-1       | 117            |
| Deletion 2           | $\Delta espC$        | b-1       | 118            |
| Deletion 2           | $\Delta espE$        | b-1       | 119            |
| Deletion 2           | $\Delta espF$        | b-1       | 121            |
| Deletion 2           | $\Delta espJ$        | b-A       | 115            |
| Deletion 2           | $\Delta espK$        | b-A       | 116            |
| Deletion 2           | $\Delta esxA$        | b-A       | 117            |
| Deletion 2           | $\Delta esxB$        | b-A       | 118            |
| Deletion 2           | $\Delta pe35$        | b-A       | 119            |
| Deletion 2           | $\Delta ppe68$       | b-A       | 121            |
| Deletion 3           | M Strain (WT) 1      | d-1       | 113            |
| Deletion 3           | M Strain (WT) 2      | d-A       | 113            |
| Deletion 3           | $\Delta eccCb_1$ 1   | d-1       | 114            |
| Deletion 3           | $\Delta eccCb_1$ 2   | d-A       | 114            |
| Deletion 3           | $\Delta MMAR_{2894}$ | d-1       | 115            |
| Deletion 3           | $\Delta espA$        | d-1       | 116            |
| Deletion 3           | $\Delta espB$        | d-1       | 117            |
| Deletion 3           | $\Delta espC$        | d-1       | 118            |

|            |                |     |     |
|------------|----------------|-----|-----|
| Deletion 3 | $\Delta espE$  | d-1 | 119 |
| Deletion 3 | $\Delta espF$  | d-1 | 121 |
| Deletion 3 | $\Delta espJ$  | d-A | 115 |
| Deletion 3 | $\Delta espK$  | d-A | 116 |
| Deletion 3 | $\Delta esxA$  | d-A | 117 |
| Deletion 3 | $\Delta esxB$  | d-A | 118 |
| Deletion 3 | $\Delta pe35$  | d-A | 119 |
| Deletion 3 | $\Delta ppe68$ | d-A | 121 |

**Table S4: Summary of Hemolysis and Cytolysis Data from Figure 1.**

|                                  | low<br>middle<br>high | Hemolytic Activity (Avg +/- St. Dev)* | P (vs WT) | P (vs $\Delta eccCb_1$ ) | Cytotoxicity (Med, Q1, Q3) † | P (vs WT) | P (vs $\Delta eccCb_1$ ) |
|----------------------------------|-----------------------|---------------------------------------|-----------|--------------------------|------------------------------|-----------|--------------------------|
| <b>Controls</b>                  |                       |                                       |           |                          |                              |           |                          |
| dH <sub>2</sub> O                |                       | 3.65<br>+/- .115                      | <0.0001   | <0.0001                  | -                            | -         | -                        |
| PBS                              |                       | .159<br>+/- .030                      | <0.0001   | ns                       | -                            | -         | -                        |
| Uninfected                       |                       | -                                     | -         | -                        | 39.5<br>27, 52.75            | <0.0001   | 0.0009                   |
| <b><i>M. marinum</i> strains</b> |                       |                                       |           |                          |                              |           |                          |
| WT                               |                       | 2.91<br>+/- .506                      | -         | <0.0001                  | 427<br>339,520               | -         | <0.0001                  |
| $\Delta eccCb_1$                 |                       | .143<br>+/- .050                      | <0.0001   | -                        | 112<br>88,129                | <0.0001   | -                        |
| $\Delta esxA$                    |                       | .077<br>+/- .007                      | <0.0001   | ns                       | 108,<br>88, 151              | <0.0001   | ns                       |
| $\Delta esxA$ /<br>comp          |                       | 2.91<br>+/- .102                      | ns        | <0.0001                  | 380,<br>313, 428             | ns        | <0.0001                  |
| $\Delta esxB$                    |                       | .074<br>+/- .013                      | <0.0001   | ns                       | 101,<br>83, 120              | <0.0001   | ns                       |
| $\Delta esxB$ /<br>comp          |                       | 1.79<br>+/- .200                      | <0.0001   | <0.0001                  | 405,<br>265.5, 528.5         | ns        | <0.0001                  |
| $\Delta espA$                    |                       | 2.54<br>+/- .263                      | 0.0247    | <0.0001                  | 368,<br>284, 466             | ns        | <0.0001                  |
| $\Delta espA$ /<br>comp          |                       | 3.57<br>+/- .136                      | <0.0001   | <0.0001                  | 453,<br>245, 580.25          | ns        | <0.0001                  |
| $\Delta espB$                    |                       | .069<br>+/- .011                      | <0.0001   | ns                       | 284,<br>230, 369             | <0.0001   | <0.0001                  |
| $\Delta espB$ /<br>comp          |                       | 2.74<br>+/- .520                      | ns        | <0.0001                  | 267,<br>177.25, 404.25       | <0.0001   | <0.0001                  |
| $\Delta espC$                    |                       | 3.04<br>+/- .173                      | ns        | <0.0001                  | 221,<br>175, 311             | <0.0001   | <0.0001                  |
| $\Delta espC$ /<br>comp          |                       | 3.38<br>+/- .113                      | 0.0002    | <0.0001                  | 241.5,<br>139, 374           | <0.0001   | <0.0001                  |
| $\Delta espE$                    |                       | .073<br>+/- .013                      | <0.0001   | ns                       | 233<br>194, 304              | <0.0001   | <0.0001                  |
| $\Delta espE$ /<br>comp          |                       | 3.00<br>+/- .306                      | ns        | <0.0001                  | 342.5<br>266, 437            | ns        | <0.0001                  |
| $\Delta espF$                    |                       | .942<br>+/- .284                      | <0.0001   | <0.0001                  | 190<br>143, 263              | <0.0001   | 0.0053                   |
| $\Delta espF$ /<br>comp          |                       | 2.98<br>+/- .195                      | ns        | <0.0001                  | 287.5<br>228.75, 346.75      | <0.0001   | <0.0001                  |
| $\Delta espJ$                    |                       | 1.29<br>+/- .142                      | <0.0001   | <0.0001                  | 281<br>205, 385              | <0.0001   | <0.0001                  |
| $\Delta espJ$ /<br>comp          |                       | 3.39<br>+/- .037                      | 0.0001    | <0.0001                  | 472,<br>355, 604             | ns        | <0.0001                  |
| $\Delta espK$                    |                       | .918<br>+/- .523                      | <0.0001   | <0.0001                  | 153<br>113, 198              | <0.0001   | ns                       |
| $\Delta espK$ /<br>comp          |                       | 3.29<br>+/- .029                      | 0.0112    | <0.0001                  | 336,<br>242.5, 414           | 0.0043    | <0.0001                  |
| $\Delta pe35$                    |                       | 2.99<br>+/- .202                      | ns        | <0.0001                  | 277<br>218, 385              | <0.0001   | <0.0001                  |
| $\Delta pe35$ /<br>comp          |                       | 3.14<br>+/- .410                      | ns        | <0.0001                  | 268.5<br>219, 406.5          | <0.0001   | <0.0001                  |
| $\Delta ppe68$                   |                       | .081<br>+/- .020                      | <0.0001   | ns                       | 214<br>158,352               | <0.0001   | <0.0001                  |
| $\Delta ppe68$ /<br>comp         |                       | 3.30<br>+/- .049                      | 0.0066    | <0.0001                  | 513,<br>338.5, 665.5         | ns        | <0.0001                  |
| $\Delta 2894$                    |                       | .227<br>+/- .044                      | <0.0001   | ns                       | 293<br>215, 345              | <0.0001   | <0.0001                  |
| $\Delta 2894$ /<br>comp          |                       | 2.78<br>+/- .146                      | ns        | <0.0001                  | 374,<br>325, 447             | ns        | <0.0001                  |

\*Averages, Standard Deviation and P values from Figure 1B. ns, not significant  
†Median values, Quartile 1 and Quartile 3, and P values from Figure 1C.

**Table S5. Comparison of *M. marinum* studies**

| Strain                 | EsxA Secretion* | EsxB Secretion | Complementation?#                                                | Study                | Approach |
|------------------------|-----------------|----------------|------------------------------------------------------------------|----------------------|----------|
| M6 ( <i>espJ</i> ::Tn) | -               | +              | no                                                               | Gao et al 2004       | western  |
|                        | +               | +              | no                                                               | Lienard et al 2020   | western  |
|                        | +/-             | +/-            | no                                                               | Champion et al 2014  | MRM MS   |
| $\Delta$ <i>espJ</i>   | +               | +              | yes, <i>espJ<sub>MM</sub></i>                                    | This study           | iTRAQ MS |
| M7 ( <i>espK</i> ::Tn) | -               | +              | yes, <i>espK<sub>MT</sub></i>                                    | Gao et al 2004       | western  |
|                        | +               | +              | no                                                               | Lienard et al 2020   | western  |
|                        | +/-             | +/-            | no                                                               | Champion et al 2014  | MRM MS   |
| $\Delta$ <i>espK</i>   | +               | +              | yes                                                              | This study           | iTRAQ MS |
| M8 ( <i>espB</i> ::Tn) | -               | +/-            | yes, <i>espL-espB<sub>MM</sub></i> ,<br><i>espB<sub>MT</sub></i> | Gao et al 2004       | western  |
|                        | -               | +/-            | no                                                               | Lienard et al 2020   | western  |
|                        | -               | -              | no                                                               | Champion et al 2014  | MRM MS   |
| $\Delta$ <i>espB</i>   | +               | +              | Yes, <i>espB<sub>MM</sub></i>                                    | This study           | iTRAQ MS |
| <i>espE</i> ::Tn       | -               | +/-            | no                                                               | Lienard et al 2020   | western  |
| $\Delta$ <i>espE</i>   | +               | +              | yes, <i>espEFG<sub>MM</sub></i> ,<br><i>espE<sub>MT</sub></i>    | Chirakos et al, 2020 | western  |
|                        | +               | +              | yes, <i>espEFG<sub>MM</sub></i>                                  | This study           | iTRAQ MS |

\* negative for secretion (-), similar to WT for secretion (+), intermediate secretion (+/-)

# MM subscript, *M. marinum* genes, MT subscript, *M. tuberculosis* genes

**Dataset S1** (separate file): iTRAQ Proteomics Data

- A. Untrimmed Data
- B. Trimmed data used for heatmap in Figure 2A
- C. Trimmed data used for Pearson Correlation in Figure 2C
- D. P values for Pearson Correlation in Figure 2C
- E. Trimmed data used for ESX-1 heatmap in Figure 5A
- F. Relative changes in the secretion of ESX-1 substrates

**Dataset S2** (separate file): Untrimmed Volcano Plot Proteomics Data and Functional Analyses, organized by strain.



## SI References

1. D. Bottai *et al.*, Disruption of the ESX-5 system of *Mycobacterium tuberculosis* causes loss of PPE protein secretion, reduction of cell wall integrity and strong attenuation. *Mol Microbiol* **83**, 1195-1209 (2012).
2. M. M. Champion, E. A. Williams, R. S. Pinapati, P. A. Champion, Correlation of Phenotypic Profiles Using Targeted Proteomics Identifies Mycobacterial Esx-1 Substrates. *J Proteome Res* **3**, 5151-5164 (2014).
3. P. A. Champion, M. M. Champion, P. Manzanillo, J. S. Cox, ESX-1 secreted virulence factors are recognized by multiple cytosolic AAA ATPases in pathogenic mycobacteria. *Mol Microbiol* **73**, 950-962 (2009).
4. R. E. Bosserman, K. R. Nicholson, M. M. Champion, P. A. Champion, A New ESX-1 Substrate in *Mycobacterium marinum* That Is Required for Hemolysis but Not Host Cell Lysis. *J Bacteriol* **201** (2019).
5. B. M. Cumming, K. C. Chinta, V. P. Reddy, A. J. C. Steyn, Role of Ergothioneine in Microbial Physiology and Pathogenesis. *Antioxid Redox Signal* **28**, 431-444 (2018).
6. A. Kapopoulou, J. M. Lew, S. T. Cole, The MycoBrowser portal: a comprehensive and manually annotated resource for mycobacterial genomes. *Tuberculosis (Edinb)* **91**, 8-13 (2011).
7. T. N. Petersen, S. Brunak, G. von Heijne, H. Nielsen, SignalP 4.0: discriminating signal peptides from transmembrane regions. *Nat Methods* **8**, 785-786 (2011).
8. A. E. Chirakos, K. R. Nicholson, A. Huffman, P. A. Champion, Conserved ESX-1 substrates EspE and EspF are virulence factors that regulate gene expression. *Infect Immun* 10.1128/IAI.00289-20 (2020).
9. K. G. Sanchez *et al.*, EspM Is a Conserved Transcription Factor That Regulates Gene Expression in Response to the ESX-1 System. *mBio* **11** (2020).
10. W. Bitter *et al.*, Systematic genetic nomenclature for type VII secretion systems. *PLoS Pathog* **5**, e1000507 (2009).
11. T. Parish, N. G. Stoker, Use of a flexible cassette method to generate a double unmarked *Mycobacterium tuberculosis tlyA plcABC* mutant by gene replacement. *Microbiology* **146 ( Pt 8)**, 1969-1975 (2000).
12. E. A. Williams *et al.*, A Nonsense Mutation in *Mycobacterium marinum* That Is Suppressible by a Novel Mechanism. *Infect Immun* **85** (2017).
13. C. Li *et al.*, FastCloning: a highly simplified, purification-free, sequence- and ligation-independent PCR cloning method. *BMC Biotechnol* **11**, 92 (2011).
14. R. a. P. Goude, "Electroporation of Mycobacteria" in *Methods in Molecular Biology*, T. P. a. D. M. Roberts, Ed. (Springer, 2015), chap. Electroporation in Mycobacteria, pp. 117-130.
15. L. Y. Gao *et al.*, A mycobacterial virulence gene cluster extending RD1 is required for cytolysis, bacterial spreading and ESAT-6 secretion. *Mol Microbiol* **53**, 1677-1693 (2004).
16. M. M. Champion, E. A. Williams, G. M. Kennedy, P. A. Champion, Direct detection of bacterial protein secretion using whole colony proteomics. *Mol Cell Proteomics* **11**, 596-604 (2012).
17. C. A. Schneider, W. S. Rasband, K. W. Eliceiri, NIH Image to ImageJ: 25 years of image analysis. *Nat Methods* **9**, 671-675 (2012).

18. P. A. Champion, S. A. Stanley, M. M. Champion, E. J. Brown, J. S. Cox, C-terminal signal sequence promotes virulence factor secretion in *Mycobacterium tuberculosis*. *Science* **313**, 1632-1636 (2006).
19. L. Sun *et al.*, Quantitative proteomics of *Xenopus laevis* embryos: expression kinetics of nearly 4000 proteins during early development. *Sci Rep* **4**, 4365 (2014).
20. E. H. Peuchen *et al.*, Phosphorylation Dynamics Dominate the Regulated Proteome during Early *Xenopus* Development. *Sci Rep* **7**, 15647 (2017).
21. I. V. Shilov *et al.*, The Paragon Algorithm, a next generation search engine that uses sequence temperature values and feature probabilities to identify peptides from tandem mass spectra. *Mol Cell Proteomics* **6**, 1638-1655 (2007).
22. W. H. Tang, I. V. Shilov, S. L. Seymour, Nonlinear fitting method for determining local false discovery rates from decoy database searches. *J Proteome Res* **7**, 3661-3667 (2008).
23. Z. Li *et al.*, Systematic comparison of label-free, metabolic labeling, and isobaric chemical labeling for quantitative proteomics on LTQ Orbitrap Velos. *J Proteome Res* **11**, 1582-1590 (2012).
24. W. H. Tang *et al.*, Discovering known and unanticipated protein modifications using MS/MS database searching. *Anal Chem* **77**, 3931-3946 (2005).
25. M. Baek *et al.*, Accurate prediction of protein structures and interactions using a three-track neural network. *Science* **373**, 871-876 (2021).
26. C. K. Stover, G. P. Bansal, S. Langerman, M. S. Hanson, Protective immunity elicited by rBCG vaccines. *Dev Biol Stand* **82**, 163-170 (1994).
27. R. E. Bosserman *et al.*, WhiB6 regulation of ESX-1 gene expression is controlled by a negative feedback loop in *Mycobacterium marinum*. *Proc Natl Acad Sci U S A* 10.1073/pnas.1710167114 (2017).
